# Supplementary material
Source: MDPI journal article supplement (https://www.mdpi.com/2073-4441/11/3/581)
Supplement: s1 [file s1]

# Supplementary Materials: Reliable Future Climatic Projections for Sustainable Hydro-Meteorological Assessments in the Western Lake Erie Basin

Sushant Mehan <sup>1,\*</sup>, Margaret W. Gitau <sup>2,\*</sup> and Dennis C. Flanagan <sup>3</sup>

<sup>1</sup> Water Resources Engineer, Sacramento, CA 95931, USA

<sup>2</sup> Department of Agricultural and Biological Engineering, Purdue University, West Lafayette, IN 47907, USA

<sup>3</sup> USDA-Agricultural Research Service, National Soil Erosion Research Laboratory, 1196 Building SOIL, Purdue University, 275 S. Russell Street, West Lafayette, IN 47907-2077, USA; [flanagan@purdue.edu](mailto:flanagan@purdue.edu)

\* Correspondence: [sushantmehan@gmail.com](mailto:sushantmehan@gmail.com) (S.M.); [mgitau@purdue.edu](mailto:mgitau@purdue.edu) (M.W.G.)

## TABLE LIST

**Table S1.** Statistical properties of daily precipitation (mm) for Adrian, MI; Fort Wayne, IN; and Norwalk, OH from the different climate projection sources in comparison with observed values.

**Table S2.** Performance evaluation in simulating number of wet days in a month by two different climate projection source (GDO and MACA) data for Adrian, MI, Fort Wayne, In, and Norwalk, OH.

**Table S3.** Performance evaluation in simulating number of dry days in a month by two different climate projection source (GDO and MACA) for Adrian, MI, Fort Wayne, In, and Norwalk, OH.

**Table S4.** Extreme event and general climate indices analysis for Adrian, MI; Fort Wayne, IN; and Norwalk, OH from the climate projection sources in comparison with values from observed data.

**Table S5.** Statistical properties of daily maximum air temperature (°C) for Adrian, MI; Fort Wayne, IN; and Norwalk, OH from the climate projection sources in comparison with observed data.

**Table S6.** Statistical properties of daily minimum air temperature, °C, for Adrian, MI; Fort Wayne, IN; and Norwalk, OH from the climate projection sources in comparison with observed data..

**Table S7..** Performance evaluation in simulating Growth Degree Days (GDD) by two different climate projection sources (GDO and MACA) for Adrian, MI, Fort Wayne, IN, and Norwalk, OH.

**Table S8.** Statistical properties of daily precipitation for Adrian, MI, Fort Wayne, IN, and Norwalk, OH based on the different bias correction methods presented on a daily and seasonal basis.

**Table S9.** Statistical properties of daily precipitation, mm, presented on a seasonal basis for Adrian, MI, Fort Wayne, IN, and Norwalk, OH from the MACA climate projections for two different future climate scenarios (RCP 4.5 and RCP 8.5), treated with power transformation bias correction method and default publicly available dataset for period from 2006–2099 compared with observed data.

**Table S10.** Performance evaluation in simulating number of wet and dry days in a month for Adrian, MI, Fort Wayne, IN, and Norwalk, OH from the MACA climate projections for two different future climate scenarios (RCP 4.5 and RCP 8.5), treated with power transformation bias correction method and default publicly available dataset for period from 2006–2099 compared with observed data.

**Table S11.** Extreme event and general climate indices analysis for Adrian, MI; Fort Wayne, IN; and Norwalk, OH from the MACA climate projections for two different future climate scenarios (RCP 4.5 and RCP 8.5), treated with power transformation bias correction method and default publicly available dataset for period from 2006–2099 compared with observed data.

**Table S12.** Details of select statistical properties computed from nine different climate model projections for precipitation (mm) and maximum and minimum temperature ( $^{\circ}\text{C}$ ) under medium and high emission scenarios (RCP 4.5 and RCP 8.5) for eight different stations in WLEB.

## FIGURE LIST

**Figure S1. (A)** (a) Density distribution charts for Fort Wayne, IN for count of monthly precipitation totals, mm, in each year (b) Distribution of annual precipitation totals, mm, with range bound from different climate model outputs. (For the period from 1966–2015 for GDO (right frame) and 1966–2005 for MACA (left frame))

**Figure S1. (B)** (a) Density distribution charts for Norwalk, OH for count of monthly precipitation totals, mm, in each year (b) Distribution of annual precipitation totals, mm, with range bound from different climate model outputs. (For the period from 1966–2015 for GDO (right frame) and 1966–2005 for MACA (left frame))

**Figure S2. (A)** Q–Q Plots to evaluate the performance of different bias correction methods for period between 1966 and 2005 to reduce the bias in simulating values for daily precipitation, mm and to present the future climatic scenarios (2006–2099) for Adrian, MI.

**Figure S2. (B)** Q–Q Plots to evaluate the performance of different bias correction methods for period between 1966 and 2005 to reduce the bias in simulating values for daily precipitation, mm and to present the future climatic scenarios (2006–2099) for Norwalk, OH.

**Figure S2. (C)** Q–Q Plots to evaluate the performance of different bias correction methods for period between 1966 and 2005 to reduce the bias in simulating values for daily maximum temperature,  $^{\circ}\text{C}$  and to present the future climatic scenarios (2006–2099) for Fort Wayne, IN.

**Figure S2. (D)** Q–Q Plots to evaluate the performance of different bias correction methods for period between 1966 and 2005 to reduce the bias in simulating values for daily maximum temperature,  $^{\circ}\text{C}$  and to present the future climatic scenarios (2006–2099) for Norwalk, OH.

**Figure S2. (E)** Q–Q Plots to evaluate the performance of different bias correction methods for period between 1966 and 2005 to reduce the bias in simulating values for daily minimum temperature,  $^{\circ}\text{C}$  and to present the future climatic scenarios (2006–2099) for Adrian, MI.

**Figure S2. (F)** Q–Q Plots to evaluate the performance of different bias correction methods for period between 1966 and 2005 to reduce the bias in simulating values for daily minimum temperature,  $^{\circ}\text{C}$  and to present the future climatic scenarios (2006–2099) for Fort Wayne, IN

**Figure S3. (A)** Comparison of GDO and MACA climate projection sources for different climate indices for Fort Wayne IN between 1966 and 2005 (GDO\_NT: GDO No Treatment; MACA\_NT: MACA No Treatment).

**Figure S3. (B)** Comparison of GDO and MACA climate projection sources for different climate indices for Norwalk, OH between 1966 and 2005 (GDO\_NT: GDO No Treatment; MACA\_NT: MACA No Treatment).

TABLES

**Table S1.** Statistical properties of daily precipitation (mm) for Adrian, MI; Fort Wayne, IN; and Norwalk, OH from the different climate projection sources in comparison with observed values.

| Dataset        | Mean             | Median           | Std. Dev.        | Skewness         | Kurtosis            | CV               | Days with no Precipitation (%) | Maximum               | Minimum    |
|----------------|------------------|------------------|------------------|------------------|---------------------|------------------|--------------------------------|-----------------------|------------|
| Adrian, MI     |                  |                  |                  |                  |                     |                  |                                |                       |            |
| Observed       | 2.4              | 0.0              | 6.5              | 4.9              | 36.0                | 0.4              | 66.9                           | 120.4                 | 0.0        |
| GDO            | ( 2.3–2.4 ), 2.4 | ( 0.2–0.2 ), 0.2 | ( 5.4–5.8 ), 5.6 | ( 4.1–5.3 ), 4.5 | ( 22.8–43.3 ), 29.3 | ( 0.4–0.4 ), 0.4 | (29.8–31.9), 30.9              | ( 70.6–110.1 ), 84.7  | ( 0–0 ), 0 |
| MACA           | ( 2.5–2.6 ), 2.5 | ( 0–0 ), 0       | ( 5.4–5.7 ), 5.6 | ( 3.8–4 ), 3.9   | ( 18.8–21.9 ), 20.8 | ( 0.4–0.5 ), 0.5 | (53.5–54.1), 53.9              | ( 67.2–71 ), 69.7     | ( 0–0 ), 0 |
|                |                  |                  |                  |                  |                     |                  |                                |                       |            |
| Fort Wayne, IN |                  |                  |                  |                  |                     |                  |                                |                       |            |
| Observed       | 2.5              | 0.0              | 6.7              | 4.7              | 32.2                | 0.4              | 63.5                           | 111.8                 | 0.0        |
| GDO            | ( 2.5–2.6 ), 2.5 | ( 0.4–0.5 ), 0.4 | (4.9–5.3 ), 5.1  | ( 3.4–4.0 ), 3.7 | ( 15.2–22.0 ), 18.3 | ( 0.5–0.5 ), 0.5 | (15.4–20.7), 17.7              | ( 52.0–72.0 ), 63.7   | ( 0–0 ), 0 |
| MACA           | ( 2.6–2.7 ), 2.6 | ( 0–0 ), 0       | ( 5.8–6 ), 5.9   | ( 3.9–4.1 ), 4   | ( 20.5–23.3 ), 22   | ( 0.4–0.4 ), 0.4 | (54.6–55.5), 54.9              | ( 65–74.5 ), 72.3     | ( 0–0 ), 0 |
|                |                  |                  |                  |                  |                     |                  |                                |                       |            |
| Norwalk, OH    |                  |                  |                  |                  |                     |                  |                                |                       |            |
| Observed       | 2.6              | 0.0              | 7.0              | 7.5              | 133.0               | 0.4              | 64                             | 229.1                 | 0.0        |
| GDO            | ( 2.5–2.5 ), 2.5 | ( 0.7–0.8 ), 0.8 | ( 4.0–4.3 ), 4.1 | ( 2.7–3.3), 2.9  | ( 9.9–15.5 ), 11.7  | ( 0.6–0.6 ), 0.6 | (10.7–13.0), 11.9              | ( 40.1–48.0), 43.6    | ( 0–0 ), 0 |
| MACA           | ( 2.6–2.7 ), 2.7 | ( 0–0 ), 0       | ( 5.4–5.7 ), 5.6 | ( 3.4–4 ), 3.9   | ( 14.3–26.9 ), 23.8 | ( 0.5–0.5 ), 0.5 | (51–51.7), 51.4                | ( 54.5–112.8 ), 101.6 | ( 0–0 ), 0 |

[Values against GDO and MACA represents the format (Minimum of the value from all 9 GCMs – Maximum of the value from all 9 GCMs), Median of the value from all 9 GCMs. Values in the parenthesis represent range of the value from all 9 GCMs.].

**Table S2.** Performance evaluation in simulating number of wet days in a month by two different climate projection source (GDO and MACA) data for Adrian, MI, Fort Wayne, In, and Norwalk, OH.

|                | Number of Wet Days in a Month |             |             |             |             |             |             |             |             |             |             |             |
|----------------|-------------------------------|-------------|-------------|-------------|-------------|-------------|-------------|-------------|-------------|-------------|-------------|-------------|
| Dataset        | January                       | February    | March       | April       | May         | June        | July        | August      | September   | October     | November    | December    |
| Adrian, MI     |                               |             |             |             |             |             |             |             |             |             |             |             |
| Observed       | 10                            | 8           | 10          | 11          | 11          | 10          | 9           | 8           | 9           | 10          | 10          | 11          |
| GDO            | (14–16), 15                   | (13–14), 13 | (16–17), 17 | (17–19), 18 | (18–19), 18 | (16–19), 18 | (18–20), 19 | (16–19), 17 | (15–16), 15 | (14–16), 15 | (15–17), 16 | (16–17), 16 |
| MACA           | (14–15), 15                   | (11–11), 11 | (14–14), 14 | (15–15), 15 | (15–16), 16 | (14–15), 14 | (15–16), 15 | (14–15), 14 | (12–14), 13 | (13–14), 14 | (12–13), 13 | (14–15), 15 |
|                |                               |             |             |             |             |             |             |             |             |             |             |             |
| Fort Wayne, IN |                               |             |             |             |             |             |             |             |             |             |             |             |
| Observed       | 12                            | 10          | 12          | 13          | 12          | 10          | 10          | 10          | 9           | 10          | 12          | 13          |
| GDO            | (18–20), 19                   | (16–18), 17 | (19–21), 20 | (21–23), 22 | (22–23), 22 | (21–22), 22 | (21–23), 22 | (19–22), 20 | (16–18), 17 | (16–18), 17 | (17–20), 18 | (19–21), 20 |
| MACA           | (13–14), 14                   | (11–11), 11 | (14–14), 14 | (15–16), 15 | (16–17), 16 | (15–16), 16 | (14–15), 15 | (13–14), 14 | (10–12), 11 | (12–13), 12 | (12–13), 12 | (14–15), 15 |
|                |                               |             |             |             |             |             |             |             |             |             |             |             |
| Norwalk, OH    |                               |             |             |             |             |             |             |             |             |             |             |             |
| Observed       | 11                            | 10          | 12          | 13          | 13          | 11          | 10          | 9           | 9           | 10          | 11          | 12          |
| GDO            | (23–24), 23                   | (20–21), 20 | (23–24), 24 | (23–25), 24 | (24–26), 25 | (22–25), 24 | (24–26), 25 | (22–24), 23 | (20–22), 21 | (19–21), 20 | (21–22), 22 | (23–24), 24 |
| MACA           | (14–15), 15                   | (12–13), 12 | (15–16), 15 | (15–16), 16 | (16–17), 17 | (15–17), 16 | (15–17), 16 | (15–16), 16 | (13–14), 14 | (13–14), 13 | (13–14), 14 | (15–16), 16 |
|                |                               |             |             |             |             |             |             |             |             |             |             |             |

**Table S3.** Performance evaluation in simulating number of dry days in a month by two different climate projection source (GDO and MACA) for Adrian, MI, Fort Wayne, In, and Norwalk, OH.

|                | Number of Dry Days in a Month |             |             |             |             |             |             |             |             |             |             |             |
|----------------|-------------------------------|-------------|-------------|-------------|-------------|-------------|-------------|-------------|-------------|-------------|-------------|-------------|
| Dataset        | January                       | February    | March       | April       | May         | June        | July        | August      | September   | October     | November    | December    |
| Adrian, MI     |                               |             |             |             |             |             |             |             |             |             |             |             |
| Observed       | 21                            | 20          | 20          | 18          | 19          | 19          | 21          | 22          | 21          | 21          | 18          | 19          |
| GDO            | (11–15), 13                   | (12–14), 12 | (11–14), 12 | (9–11), 10  | (10–12), 10 | (9–13), 10  | (9–13), 10  | (10–13), 11 | (11–14), 12 | (12–16), 13 | (11–13), 11 | (11–13), 12 |
| MACA           | (16–17), 17                   | (17–18), 17 | (17–17), 17 | (15–15), 15 | (15–16), 16 | (15–16), 16 | (15–16), 16 | (16–17), 17 | (16–18), 17 | (17–18), 18 | (17–18), 17 | (16–17), 16 |
|                |                               |             |             |             |             |             |             |             |             |             |             |             |
| Fort Wayne, IN |                               |             |             |             |             |             |             |             |             |             |             |             |
| Observed       | 19                            | 18          | 19          | 17          | 19          | 20          | 21          | 22          | 21          | 21          | 18          | 18          |
| GDO            | (11–13), 12                   | (10–12), 11 | (10–11), 11 | (7–9), 8    | (8–9), 8    | (8–9), 8    | (8–10), 9   | (9–12), 11  | (12–14), 13 | (13–15), 14 | (10–12), 11 | (10–12), 11 |
| MACA           | (17–18), 18                   | (17–18), 17 | (17–17), 17 | (14–15), 15 | (14–15), 15 | (14–15), 15 | (16–17), 16 | (17–18), 17 | (18–20), 19 | (18–19), 19 | (17–18), 18 | (16–17), 17 |
|                |                               |             |             |             |             |             |             |             |             |             |             |             |
| Norwalk, OH    |                               |             |             |             |             |             |             |             |             |             |             |             |
| Observed       | 19                            | 19          | 19          | 17          | 18          | 19          | 21          | 22          | 20          | 21          | 19          | 18          |
| GDO            | (7–8), 7                      | (7–8), 8    | (6–8), 7    | (5–7), 6    | (5–7), 6    | (5–8), 6    | (5–7), 6    | (7–9), 8    | (8–10), 9   | (10–12), 11 | (7–9), 8    | (6–8), 7    |
| MACA           | (16–17), 17                   | (16–16), 16 | (16–17), 16 | (14–15), 14 | (14–15), 14 | (14–15), 14 | (15–16), 15 | (15–16), 16 | (16–18), 17 | (17–18), 18 | (16–17), 16 | (15–16), 15 |
|                |                               |             |             |             |             |             |             |             |             |             |             |             |

**Table S4.** Extreme event and general climate indices analysis for Adrian, MI; Fort Wayne, IN; and Norwalk, OH from the climate projection sources in comparison with values from observed data.

|                | Extreme Event and General Climate Indices |                    |                         |                         |                                           |             |                  |                  |                  |                  |                  |                  |                     |                  |
|----------------|-------------------------------------------|--------------------|-------------------------|-------------------------|-------------------------------------------|-------------|------------------|------------------|------------------|------------------|------------------|------------------|---------------------|------------------|
| Dataset        | Maximum Dry Length                        | Maximum Wet Length | Number of dry sequences | Number of wet sequences | Number of days for optimum growth of corn | Snow Days   | Pdd              | Pww              | Pwd              | Pdw              | Ld               | Lw               | Td                  | Tw               |
| Adrian, MI     |                                           |                    |                         |                         |                                           |             |                  |                  |                  |                  |                  |                  |                     |                  |
| Observed       | 26                                        | 9                  | 33                      | 153                     | 51                                        | 30          | 0.7              | 0.5              | 0.3              | 0.5              | 4                | 1                | 1                   | 4                |
| GDO            | (13–19), 17                               | (17–24), 21        | (0–4), 2                | (397–572), 462          | (48–63), 52                               | (38–55), 42 | ( 0.4–0.5 ), 0.5 | ( 0.7–0.7 ), 0.7 | ( 0.5–0.6 ), 0.5 | ( 0.3–0.3 ), 0.3 | ( 1.7–1.9 ), 1.8 | ( 2.1–2.4 ), 2.2 | ( 13.2–32.5 ), 20.8 | ( 0.7–0.8 ), 0.7 |
| MACA           | (17–29), 22                               | (16–23), 19        | (4–17), 11              | (318–450), 387          | (57–61), 60                               | (40–43), 42 | ( 0.6–0.7 ), 0.7 | ( 0.6–0.6 ), 0.6 | ( 0.3–0.4 ), 0.3 | ( 0.4–0.4 ), 0.4 | ( 2.8–3.2 ), 3   | ( 1.5–1.6 ), 1.5 | ( 1.9–2.5 ), 2.1    | ( 1.3–1.5 ), 1.3 |
| MACA Treated   | (17–32), 24                               | (15–23), 19        | (4–19), 12              | (314–446), 381          | (28–30), 29                               | (60–62), 61 | ( 0.6–0.7 ), 0.7 | ( 0.6–0.6 ), 0.6 | ( 0.3–0.4 ), 0.3 | ( 0.4–0.4 ), 0.4 | ( 2.8–3.2 ), 3   | ( 1.5–1.6 ), 1.5 | ( 1.9–2.5 ), 2.1    | ( 1.3–1.5 ), 1.3 |
| Fort Wayne, IN |                                           |                    |                         |                         |                                           |             |                  |                  |                  |                  |                  |                  |                     |                  |
| Observed       | 30                                        | 11                 | 16                      | 166                     | 63                                        | 33          | 0.7              | 0.5              | 0.3              | 0.5              | 3                | 1                | 1                   | 3                |
| GDO            | (12–22), 16                               | (25–38), 30        | (0–4), 2                | (448–534), 501          | (67–76), 72                               | (51–63), 57 | ( 0.3–0.4 ), 0.4 | ( 0.8–0.8 ), 0.8 | ( 0.6–0.7 ), 0.6 | ( 0.2–0.2 ), 0.2 | ( 1.5–1.7 ), 1.6 | ( 2.5–3 ), 2.6   | ( 52.3–174 ), 81    | ( 0.5–0.6 ), 0.5 |
| MACA           | (22–37), 27                               | (15–29), 21        | (8–23), 16              | (310–432), 377          | (63–67), 65                               | (34–37), 36 | ( 0.7–0.7 ), 0.7 | ( 0.6–0.6 ), 0.6 | ( 0.3–0.3 ), 0.3 | ( 0.4–0.4 ), 0.4 | ( 2.9–3.3 ), 3.2 | ( 1.4–1.5 ), 1.5 | ( 1.7–2.3 ), 1.9    | ( 1.3–1.5 ), 1.4 |
| MACA Treated   | (22–37), 27                               | (14–29), 21        | (9–23), 17              | (309–432), 375          | (65–67), 66                               | (42–44), 43 | ( 0.7–0.7 ), 0.7 | ( 0.6–0.6 ), 0.6 | ( 0.3–0.3 ), 0.3 | ( 0.4–0.4 ), 0.4 | ( 2.9–3.3 ), 3.1 | ( 1.4–1.5 ), 1.5 | ( 1.7–2.3 ), 1.9    | ( 1.3–1.5 ), 1.4 |
| Norwalk, OH    |                                           |                    |                         |                         |                                           |             |                  |                  |                  |                  |                  |                  |                     |                  |
| Observed       | 25                                        | 18                 | 15                      | 183                     | 55                                        | 31          | 0.7              | 0.5              | 0.3              | 0.5              | 3                | 1                | 1                   | 3                |
| GDO            | (10–14), 12                               | (37–50), 44        | (0–0), 0                | (394–575), 453          | (64–74), 69                               | (63–71), 68 | ( 0.2–0.3 ), 0.3 | ( 0.9–0.9 ), 0.9 | ( 0.7–0.8 ), 0.7 | ( 0.1–0.1 ), 0.1 | ( 1.3–1.5 ), 1.4 | ( 3.1–4.4 ), 3.5 | ( 256–2016 ), 738   | ( 0.5–0.5 ), 0.5 |
| MACA           | (16–29), 21                               | (14–27), 20        | (2–15), 7               | (346–473), 410          | (62–66), 64                               | (38–41), 40 | ( 0.6–0.7 ), 0.6 | ( 0.6–0.6 ), 0.6 | ( 0.3–0.4 ), 0.4 | ( 0.4–0.4 ), 0.4 | ( 2.6–3 ), 2.9   | ( 1.5–1.6 ), 1.5 | ( 2.2–3.1 ), 2.5    | ( 1.1–1.3 ), 1.2 |
| MACA Treated   | (18–29), 22                               | (13–27), 19        | (4–17), 9               | (322–456), 394          | (51–54), 52                               | (50–53), 52 | ( 0.6–0.7 ), 0.6 | ( 0.6–0.6 ), 0.6 | ( 0.3–0.4 ), 0.4 | ( 0.4–0.4 ), 0.4 | ( 2.6–3 ), 2.9   | ( 1.5–1.6 ), 1.5 | ( 2.2–3.1 ), 2.5    | ( 1.1–1.3 ), 1.2 |

**Table S5.** Statistical properties of daily maximum air temperature (°C) for Adrian, MI; Fort Wayne, IN; and Norwalk, OH from the climate projection sources in comparison with observed data.

| Treatment      | Mean                   | Median              | Std. Dev.           | Skewness           | Kurtosis           | CV               | Number of days with<br>Maximum Temperature more<br>than 35°C (expressed in %) | Maximum             | Minimum               |
|----------------|------------------------|---------------------|---------------------|--------------------|--------------------|------------------|-------------------------------------------------------------------------------|---------------------|-----------------------|
| Adrian, MI     |                        |                     |                     |                    |                    |                  |                                                                               |                     |                       |
| Observed       | 15.0                   | 16.1                | 11.5                | −0.2               | −1.1               | 1.3              | 0.3                                                                           | 40.0                | −20.0                 |
| GDO            | ( 14.9–15.2 ),<br>15.0 | ( 15.8–16.3 ), 16.1 | ( 11.4–11.7 ), 11.5 | (−0.2–−0.2 ), −0.2 | (−1.2–−1.1 ), −1.1 | ( 1.3–1.3 ), 1.3 | (0–0.4), 0.2                                                                  | ( 36.0–38.9 ), 37.4 | (−20.4–−16.2 ), −18.5 |
| MACA           | ( 15.3–15.5 ),<br>15.4 | ( 16–16.5 ), 16.2   | ( 11.4–11.6 ), 11.5 | (−0.2–−0.2 ), −0.2 | (−1.1–−1.1 ), −1.1 | ( 1.3–1.4 ), 1.3 | (0.5–0.7), 0.6                                                                | ( 39.5–40.2 ), 39.9 | (−17.5 —16.5 ), −17.1 |
|                |                        |                     |                     |                    |                    |                  |                                                                               |                     |                       |
| Fort Wayne, IN |                        |                     |                     |                    |                    |                  |                                                                               |                     |                       |
| Observed       | 15.4                   | 16.7                | 11.8                | −0.3               | −1.0               | 1.3              | 0.3                                                                           | 41.1                | −23.9                 |
| GDO            | ( 15.5–15.8 ), 15.6    | ( 16.8–17.3 ), 17.1 | ( 11.5–11.8 ), 11.6 | (−0.3–−0.3 ), −0.3 | (−1.1–−1.0 ), −1.1 | ( 1.3–1.4 ), 1.3 | (0.1–0.5), 0.2                                                                | ( 36.7–39.5 ), 38.1 | (−23.2–−17.4 ), −19.7 |
| MACA           | ( 15.5–15.9 ),<br>15.7 | ( 16.7–17.3 ), 16.9 | ( 11.4–11.7 ), 11.5 | (−0.3–−0.3 ), −0.3 | (−1–−1 ), −1       | ( 1.3–1.4 ), 1.4 | (0.5–0.8), 0.7                                                                | ( 40.6–42.1 ), 41.8 | (−22.1–−20.3 ), −21.4 |
|                |                        |                     |                     |                    |                    |                  |                                                                               |                     |                       |
| Norwalk, OH    |                        |                     |                     |                    |                    |                  |                                                                               |                     |                       |
| Observed       | 15.0                   | 16.1                | 11.4                | −0.3               | −1.0               | 1.3              | 0.2                                                                           | 39.4                | −22.2                 |
| GDO            | ( 15.3–15.6 ), 15.4    | ( 16.4–16.9 ), 16.7 | ( 11.0–11.4 ), 11.2 | (−0.3–−0.3 ), −0.3 | (−1.1–−1.0 ), −1.1 | ( 1.3–1.4 ), 1.4 | (0–0.3), 0.1                                                                  | ( 34.8–39.8 ), 36.9 | (−21.3–−14.9 ), −18.2 |
| MACA           | ( 15.1–15.4 ),<br>15.2 | ( 16–16.5 ), 16.2   | ( 10.9–11.2 ), 11   | (−0.3–−0.2 ), −0.2 | (−1.1–−1 ), −1.1   | ( 1.4–1.4 ), 1.4 | (0.2–0.3), 0.2                                                                | ( 37.6–37.8 ), 37.7 | (−19.2–−17.8 ), −18.8 |
|                |                        |                     |                     |                    |                    |                  |                                                                               |                     |                       |

**Supplementary Table S6** Statistical properties of daily minimum air temperature, °C, for Adrian, MI; Fort Wayne, IN; and Norwalk, OH from the climate projection sources in comparison with observed data..

| Treatment      | Mean             | Median           | Std. Dev.          | Skewness            | Kurtosis            | CV               | Days with Minimum Temperature < 2°C (expressed in %) | Maximum             | Minimum                |
|----------------|------------------|------------------|--------------------|---------------------|---------------------|------------------|------------------------------------------------------|---------------------|------------------------|
| Adrian, MI     |                  |                  |                    |                     |                     |                  |                                                      |                     |                        |
| Observed       | 3.1              | 3.3              | 10.0               | −0.3                | −0.5                | 0.3              | 46.3                                                 | 24.4                | −30.0                  |
| GDO            | ( 3.2–3.5 ), 3.3 | ( 3.3–3.8 ), 3.5 | ( 9.5–10 ), 9.7    | ( −0.3–−0.2 ), −0.2 | ( −0.9–−0.7 ), −0.8 | ( 0.3–0.4 ), 0.4 | (44.4–46.0), 45.4                                    | ( 21.7–26.3 ), 23.6 | ( −31.2–−25.8 ), −29.0 |
| MACA           | ( 3.5–3.7 ), 3.6 | ( 3.4–3.7 ), 3.5 | ( 9.6–9.7 ), 9.7   | ( −0.2–−0.2 ), −0.2 | ( −0.7–−0.6 ), −0.7 | ( 0.4–0.4 ), 0.4 | (44.8–45.7), 45.3                                    | ( 23.8–24 ), 24     | ( −28.2–−26.4 ), −27.9 |
|                |                  |                  |                    |                     |                     |                  |                                                      |                     |                        |
| Fort Wayne, IN |                  |                  |                    |                     |                     |                  |                                                      |                     |                        |
| Observed       | 4.8              | 5.0              | 10.3               | −0.4                | −0.5                | 0.5              | 41.1                                                 | 25.6                | −30.0                  |
| GDO            | ( 4.8–5.1 ), 4.9 | ( 5.1–5.5 ), 5.3 | ( 9.9–10.5 ), 10.2 | ( −0.4–−0.3 ), −0.3 | ( −0.8–−0.6 ), −0.7 | ( 0.5–0.5 ), 0.5 | (39.5–41.2), 40.3                                    | ( 22.7–26.8 ), 25.0 | ( −33.8–−26.8 ), −30.2 |
| MACA           | ( 4.9–5.2 ), 5.1 | ( 5.1–5.5 ), 5.3 | ( 9.9–10.1 ), 10   | ( −0.3–−0.2 ), −0.3 | ( −0.7–−0.6 ), −0.6 | ( 0.5–0.5 ), 0.5 | (39.9–40.7), 40.4                                    | ( 25.2–25.5 ), 25.5 | ( −28.9–−26.9 ), −28.4 |
|                |                  |                  |                    |                     |                     |                  |                                                      |                     |                        |
| Norwalk, OH    |                  |                  |                    |                     |                     |                  |                                                      |                     |                        |
| Observed       | 4.4              | 4.4              | 10.1               | −0.3                | −0.6                | 0.4              | 41.8                                                 | 25.0                | −29.4                  |
| GDO            | ( 4.6–4.9 ), 4.7 | ( 4.9–5.2 ), 5.0 | ( 9.5–10.1 ), 9.8  | ( −0.3–−0.2 ), −0.3 | ( −0.9–−0.7 ), −0.8 | ( 0.5–0.5 ), 0.5 | (39.9–41.6), 40.9                                    | ( 22.0–27.8 ), 24.6 | ( −29.7–−23.6 ), −27.2 |
| MACA           | ( 4.6–4.8 ), 4.7 | ( 4.6–5 ), 4.7   | ( 9.5–9.7 ), 9.6   | ( −0.3–−0.2 ), −0.2 | ( −0.8–−0.7 ), −0.7 | ( 0.5–0.5 ), 0.5 | (41–41.6), 41.4                                      | ( 24–24 ), 24       | ( −28–−27 ), −27.5     |
|                |                  |                  |                    |                     |                     |                  |                                                      |                     |                        |



**Table S7.** Performance evaluation in simulating Growth Degree Days (GDD) by two different climate projection sources (GDO and MACA) for Adrian, MI, Fort Wayne, IN, and Norwalk, OH.

|                | Growth Degree Days (GDD) |                |                   |                   |
|----------------|--------------------------|----------------|-------------------|-------------------|
|                | 1–May                    | 15–May         | 1–Oct             | 15–Oct            |
| Adrian, MI     |                          |                |                   |                   |
| Observed       | 60                       | 104            | 1364              | 1386              |
| GDO            | (47–69), 64              | (93–126), 113  | (1364–1462), 1449 | (1455–1526), 1495 |
| MACA           | (56–76), 68              | (110–135), 125 | (1437–1508), 1481 | (1494–1570), 1531 |
|                |                          |                |                   |                   |
| Fort Wayne, IN |                          |                |                   |                   |
| Observed       | 86                       | 148            | 1615              | 1648              |
| GDO            | (74–95), 86              | (138–160), 148 | (1627–1676), 1652 | (1685–1754), 1720 |
| MACA           | (77–103), 91             | (146–175), 163 | (1602–1679), 1650 | (1667–1769), 1713 |
|                |                          |                |                   |                   |
| Norwalk, OH    |                          |                |                   |                   |
| Observed       | 80                       | 129            | 1493              | 1516              |
| GDO            | (60–90), 82              | (115–151), 137 | (1503–1588), 1552 | (1562–1666), 1615 |
| MACA           | (58–82), 72              | (113–141), 129 | (1490–1545), 1515 | (1528–1620), 1565 |
|                |                          |                |                   |                   |

**Table S8.** Statistical properties of daily precipitation for Adrian, MI, Fort Wayne, IN, and Norwalk, OH based on the different bias correction methods presented on a daily and seasonal basis.

| Period/<br>Season |                  |                  |                  |                  |                  |                     |                  |                                   |                        |                |
|-------------------|------------------|------------------|------------------|------------------|------------------|---------------------|------------------|-----------------------------------|------------------------|----------------|
|                   | Dataset          | Mean             | Median           | Std. Dev.        | Skewness         | Kurtosis            | CV               | Days with no<br>Precipitation (%) | Maximum                | Minimum        |
| Adrian, MI        |                  |                  |                  |                  |                  |                     |                  |                                   |                        |                |
| Daily             | Observed         | 2.4              | 0.0              | 6.5              | 4.9              | 36.0                | 0.4              | 66.9                              | 120.4                  | 0.0            |
|                   | MACANoTreatment  | ( 2.5–2.6 ), 2.5 | ( 0–0 ), 0       | ( 5.4–5.7 ), 5.6 | ( 3.8–4 ), 3.9   | ( 18.8–21.9 ), 20.8 | ( 0.4–0.5 ), 0.5 | (53.5–54.1), 53.9                 | ( 67.2–71 ), 69.7      | ( 0–0 ), 0     |
|                   | MACAConventional | ( 2.4–2.5 ), 2.4 | ( 0–0 ), 0       | ( 6.5–6.6 ), 6.6 | ( 5.3–5.6 ), 5.5 | ( 41.9–50.7 ), 47.9 | ( 0.4–0.4 ), 0.4 | (53.5–54.1), 53.9                 | ( 116.6–134.3 ), 125.1 | ( 0–0 ), 0     |
|                   | MACACLIGEN75     | ( 0.6–0.7 ), 0.7 | ( 0.5–0.6 ), 0.5 | ( 0.5–0.5 ), 0.5 | ( 1.3–1.5 ), 1.4 | ( 2.5–3.4 ), 2.9    | ( 1.3–1.3 ), 1.3 | (7.5–9.2), 8.4                    | ( 3.9–5.5 ), 4.7       | ( 0–0 ), 0     |
|                   | MACACLIGEN90     | ( 1.9–2 ), 1.9   | ( 1.7–1.8 ), 1.8 | ( 1–1.1 ), 1.1   | ( 0.8–1 ), 0.9   | ( 0.9–1.8 ), 1.2    | ( 1.7–1.9 ), 1.8 | (0.1–0.2), 0.1                    | ( 7.9–9.6 ), 8.6       | ( 0–0 ), 0     |
|                   | MACALARSWG75     | ( 2.3–2.6 ), 2.4 | ( 1.8–2.1 ), 1.9 | ( 1.9–2 ), 1.9   | ( 1.4–1.7 ), 1.5 | ( 2.9–4.4 ), 3.5    | ( 1.2–1.3 ), 1.2 | (2–3.7), 2.6                      | ( 13.9–20.1 ), 18.1    | ( 0–0 ), 0     |
|                   | MACALARSWG90     | ( 7.4–7.8 ), 7.6 | ( 6.7–7.1 ), 6.8 | ( 4.2–4.5 ), 4.3 | ( 1–1.1 ), 1.1   | ( 1.3–2.1 ), 1.7    | ( 1.7–1.8 ), 1.7 | (0–0), 0                          | ( 30.5–40.1 ), 35.4    | ( 0–0.1 ), 0   |
| Fall              | Observed         | 2.3              | 0.0              | 5.7              | 4.1              | 21.0                | 0.4              | 65.2                              | 59.4                   | 0.0            |
|                   | MACANoTreatment  | ( 2.2–2.3 ), 2.3 | ( 0–0 ), 0       | ( 5–5.3 ), 5.2   | ( 3.7–4.1 ), 3.9 | ( 17.6–23.8 ), 20.9 | ( 0.4–0.4 ), 0.4 | (54.5–56.4), 55.3                 | ( 47.2–65.5 ), 59.9    | ( 0–0 ), 0     |
|                   | MACAConventional | ( 2.3–2.3 ), 2.3 | ( 0–0 ), 0       | ( 5.7–5.9 ), 5.8 | ( 4.5–4.8 ), 4.7 | ( 25.8–34.5 ), 29.9 | ( 0.4–0.4 ), 0.4 | (54.5–56.4), 55.3                 | ( 59.5–90.6 ), 74.7    | ( 0–0 ), 0     |
|                   | MACACLIGEN75     | ( 0.5–0.7 ), 0.6 | ( 0.4–0.6 ), 0.5 | ( 0.4–0.5 ), 0.4 | ( 1.2–1.6 ), 1.4 | ( 1.8–3.8 ), 2.9    | ( 1.3–1.5 ), 1.4 | (8–11), 9.5                       | ( 2.9–3.8 ), 3.3       | ( 0–0 ), 0     |
|                   | MACACLIGEN90     | ( 1.7–1.9 ), 1.8 | ( 1.6–1.7 ), 1.6 | ( 0.9–1 ), 0.9   | ( 0.7–1 ), 0.9   | ( 0.5–1.7 ), 1.1    | ( 1.8–2 ), 1.9   | (0.1–0.1), 0.1                    | ( 6–8.5 ), 7           | ( 0–0 ), 0     |
|                   | MACALARSWG75     | ( 1.8–2.2 ), 2   | ( 1.4–1.8 ), 1.6 | ( 1.5–1.7 ), 1.6 | ( 1.3–1.9 ), 1.6 | ( 2.1–6.7 ), 4.2    | ( 1.2–1.4 ), 1.3 | (2.1–5), 3.3                      | ( 10.6–19.8 ), 14.4    | ( 0–0 ), 0     |
|                   | MACALARSWG90     | ( 2.3–7.1 ), 6.3 | ( 0–6.5 ), 5.4   | ( 3.5–5.7 ), 4   | ( 0.9–4.1 ), 1.4 | ( 0.8–21 ), 4       | ( 0.4–1.9 ), 1.6 | (0–63.8), 7.1                     | ( 24.9–59.4 ), 33.3    | ( 0–0.4 ), 0.1 |
| Spring            | Observed         | 3.0              | 0.0              | 7.2              | 4.0              | 22.7                | 0.4              | 63.5                              | 80.3                   | 0.0            |
|                   | MACANoTreatment  | ( 2.9–3.1 ), 3   | ( 0–0 ), 0       | ( 6–6.4 ), 6.3   | ( 3.4–3.7 ), 3.5 | ( 14.6–18.4 ), 16.6 | ( 0.5–0.5 ), 0.5 | (50.5–51.4), 50.8                 | ( 56–71 ), 67          | ( 0–0 ), 0     |
|                   | MACAConventional | ( 3–3 ), 3       | ( 0–0 ), 0       | ( 7.3–7.5 ), 7.4 | ( 4.4–4.8 ), 4.6 | ( 25.7–34.4 ), 30.9 | ( 0.4–0.4 ), 0.4 | (50.5–51.4), 50.8                 | ( 88.4–115.2 ), 102.5  | ( 0–0 ), 0     |

|                |                  |                  |                     |                  |                     |                     |                  |                   |                        |                |
|----------------|------------------|------------------|---------------------|------------------|---------------------|---------------------|------------------|-------------------|------------------------|----------------|
|                | MACACLIGEN75     | ( 0.8–0.9 ), 0.9 | ( 0.6–0.8 ),<br>0.7 | ( 0.5–0.6 ), 0.6 | ( 1–1.4 ), 1.1      | ( 1.4–3 ), 1.9      | ( 1.4–1.6 ), 1.5 | (3–3.9), 3.5      | ( 3.7–5.5 ), 4.5       | ( 0–0 ), 0     |
|                | MACACLIGEN90     | ( 2.3–2.5 ), 2.4 | ( 2.1–2.3 ),<br>2.2 | ( 1–1.1 ), 1.1   | ( 0.7–1 ), 0.8      | ( 0.7–2 ), 1.1      | ( 2–2.3 ), 2.2   | (0–0.1), 0        | ( 7.2–9.1 ), 8.1       | ( 0–0.3 ), 0.1 |
|                | MACALARSWG75     | ( 2.8–3.3 ), 3.1 | ( 2.4–2.8 ),<br>2.6 | ( 2–2.2 ), 2.1   | ( 1.2–1.5 ),<br>1.4 | ( 2.2–3.6 ), 2.8    | ( 1.3–1.5 ), 1.5 | (0.7–1.6), 1.1    | ( 13.9–18.7 ), 16.9    | ( 0–0 ), 0     |
|                | MACALARSWG90     | ( 3–9.6 ), 8.4   | ( 0–8.9 ), 7.5      | ( 4.2–7.2 ), 4.9 | ( 0.8–4 ), 1.3      | ( 0.8–22.7 ), 3.6   | ( 0.4–2.1 ), 1.8 | (0–61.3), 6.8     | ( 29.9–80.3 ), 38.4    | ( 0–0.7 ), 0.2 |
| Summer         | Observed         | 2.8              | 0.0                 | 7.9              | 5.1                 | 38.4                | 0.4              | 70.7              | 120.4                  | 0.0            |
|                | MACANoTreatment  | ( 2.9–3 ), 2.9   | ( 0–0 ), 0          | ( 6–6.4 ), 6.2   | ( 3.5–3.8 ),<br>3.6 | ( 16.5–19.9 ), 18.4 | ( 0.5–0.5 ), 0.5 | (52.7–54.3), 53.4 | ( 67.2–67.2 ), 67.2    | ( 0–0 ), 0     |
|                | MACAConventional | ( 2.8–2.8 ), 2.8 | ( 0–0 ), 0          | ( 7.7–8 ), 7.9   | ( 5.6–6.2 ),<br>5.9 | ( 45.1–60.8 ), 53   | ( 0.4–0.4 ), 0.4 | (52.7–54.3), 53.4 | ( 116.6–134.3 ), 125.1 | ( 0–0 ), 0     |
|                | MACACLIGEN75     | ( 0.8–0.9 ), 0.8 | ( 0.6–0.8 ),<br>0.7 | ( 0.5–0.6 ), 0.6 | ( 1–1.4 ), 1.2      | ( 1.2–2.8 ), 2      | ( 1.4–1.6 ), 1.4 | (5–7.3), 5.7      | ( 3.5–5.4 ), 4.2       | ( 0–0 ), 0     |
|                | MACACLIGEN90     | ( 2.2–2.4 ), 2.3 | ( 2.1–2.2 ),<br>2.1 | ( 1.1–1.2 ), 1.1 | ( 0.7–1 ), 0.8      | ( 0.7–1.6 ), 1      | ( 1.9–2.2 ), 2.1 | (0–0.1), 0.1      | ( 7.7–9.6 ), 8.4       | ( 0–0.2 ), 0   |
|                | MACALARSWG75     | ( 2.7–3.2 ), 3   | ( 2.3–2.7 ),<br>2.5 | ( 2.1–2.3 ), 2.2 | ( 1–1.4 ), 1.2      | ( 0.8–3.1 ), 2      | ( 1.3–1.4 ), 1.4 | (1–4.4), 2.2      | ( 13.6–20.1 ), 16.6    | ( 0–0 ), 0     |
|                | MACALARSWG90     | ( 2.8–9.3 ), 8.3 | ( 0–8.7 ), 7.5      | ( 4.3–7.9 ), 4.8 | ( 0.9–5.1 ),<br>1.4 | ( 1.3–38.4 ), 5.7   | ( 0.4–2.2 ), 1.8 | (0–69.4), 7.7     | ( 30–120.4 ), 43.8     | ( 0–0.4 ), 0.2 |
| Winter         | Observed         | 1.7              | 0.0                 | 4.6              | 4.8                 | 32.8                | 0.4              | 68.1              | 59.7                   | 0.0            |
|                | MACANoTreatment  | ( 1.7–1.9 ), 1.8 | ( 0–0 ), 0          | ( 4.1–4.5 ), 4.4 | ( 4–4.8 ), 4.5      | ( 20.2–31.8 ), 27.4 | ( 0.4–0.4 ), 0.4 | (55.5–56.4), 56   | ( 41–56.4 ), 53.4      | ( 0–0 ), 0     |
|                | MACAConventional | ( 1.7–1.7 ), 1.7 | ( 0–0 ), 0          | ( 4.5–4.6 ), 4.6 | ( 4.8–5.5 ),<br>5.2 | ( 29.8–43.6 ), 37.4 | ( 0.4–0.4 ), 0.4 | (55.5–56.4), 56   | ( 50.8–66.1 ), 60.7    | ( 0–0 ), 0     |
|                | MACACLIGEN75     | ( 0.4–0.5 ), 0.4 | ( 0.3–0.3 ),<br>0.3 | ( 0.3–0.4 ), 0.3 | ( 1.5–2.2 ),<br>1.7 | ( 3.7–10.5 ), 5.7   | ( 1.2–1.3 ), 1.3 | (13.6–17.4), 15.1 | ( 2.3–3.9 ), 3         | ( 0–0 ), 0     |
|                | MACACLIGEN90     | ( 1.3–1.4 ), 1.3 | ( 1.1–1.3 ),<br>1.2 | ( 0.7–0.8 ), 0.8 | ( 1–1.3 ), 1.1      | ( 1–3.5 ), 1.9      | ( 1.6–1.8 ), 1.7 | (0.2–0.3), 0.2    | ( 5.4–8.2 ), 6.4       | ( 0–0 ), 0     |
|                | MACALARSWG75     | ( 1.4–1.9 ), 1.6 | ( 1.2–1.5 ),<br>1.3 | ( 1.2–1.4 ), 1.3 | ( 1.4–2 ), 1.7      | ( 3.1–7 ), 4.8      | ( 1.2–1.3 ), 1.2 | (2.4–4.8), 3.6    | ( 8.8–12.4 ), 11       | ( 0–0 ), 0     |
|                | MACALARSWG90     | ( 1.7–5.6 ), 4.9 | ( 0–4.9 ), 4.1      | ( 3–4.6 ), 3.4   | ( 1.1–4.8 ),<br>1.6 | ( 1.5–32.8 ), 5.6   | ( 0.4–1.7 ), 1.5 | (0–66.8), 7.4     | ( 21.1–59.7 ), 29.8    | ( 0–0.3 ), 0.1 |
| Fort Wayne, IN |                  |                  |                     |                  |                     |                     |                  |                   |                        |                |
| Daily          | Observed         | 2.5              | 0.0                 | 6.7              | 4.7                 | 32.2                | 0.4              | 63.5              | 111.8                  | 0.0            |
|                | MACANoTreatment  | ( 2.6–2.7 ), 2.6 | ( 0–0 ), 0          | ( 5.8–6 ), 5.9   | ( 3.9–4.1 ), 4      | ( 20.5–23.3 ), 22   | ( 0.4–0.4 ), 0.4 | (54.6–55.5), 54.9 | ( 65–74.5 ), 72.3      | ( 0–0 ), 0     |
|                | MACAConventional | ( 2.5–2.5 ), 2.5 | ( 0–0 ), 0          | ( 6.7–6.7 ), 6.7 | ( 5–5.5 ), 5.3      | ( 35.8–45.1 ), 40.3 | ( 0.4–0.4 ), 0.4 | (54.6–55.5), 55   | ( 92.7–127.6 ), 108.5  | ( 0–0 ), 0     |

|        |                  |                  |                     |                  |                     |                     |                  |                   |                     |                |
|--------|------------------|------------------|---------------------|------------------|---------------------|---------------------|------------------|-------------------|---------------------|----------------|
|        | MACACLIGEN75     | ( 0.7–0.7 ), 0.7 | ( 0.5–0.6 ),<br>0.6 | ( 0.5–0.6 ), 0.5 | ( 1.2–1.5 ),<br>1.3 | ( 2.1–3.4 ), 2.5    | ( 1.2–1.3 ), 1.3 | (9.6–12.4), 11.2  | ( 4.1–5.4 ), 4.6    | ( 0–0 ), 0     |
|        | MACACLIGEN90     | ( 2–2.1 ), 2     | ( 1.9–1.9 ),<br>1.9 | ( 1.1–1.1 ), 1.1 | ( 0.8–1 ), 0.9      | ( 0.8–1.3 ), 1.1    | ( 1.8–1.9 ), 1.8 | (0.1–0.3), 0.2    | ( 8.1–11.8 ), 9.1   | ( 0–0 ), 0     |
|        | MACALARSWG75     | ( 2.4–2.7 ), 2.5 | ( 1.9–2.3 ), 2      | ( 2–2.1 ), 2     | ( 1.4–1.6 ),<br>1.4 | ( 2.7–4.2 ), 3      | ( 1.2–1.3 ), 1.2 | (3.6–5.4), 4.4    | ( 15.2–22.9 ), 18.4 | ( 0–0 ), 0     |
|        | MACALARSWG90     | ( 7.7–8.2 ), 7.9 | ( 7–7.5 ), 7.1      | ( 4.3–4.6 ), 4.5 | ( 1–1.1 ), 1        | ( 1.4–2.5 ), 1.8    | ( 1.7–1.8 ), 1.8 | (0–0), 0          | ( 35.5–49.8 ), 40.5 | ( 0–0 ), 0     |
| Fall   | Observed         | 2.3              | 0.0                 | 6.0              | 4.4                 | 25.1                | 0.4              | 62.9              | 68.3                | 0.0            |
|        | MACANoTreatment  | ( 2.3–2.5 ), 2.4 | ( 0–0 ), 0          | ( 5.3–5.6 ), 5.5 | ( 3.6–3.9 ),<br>3.8 | ( 16.2–20.3 ), 18.6 | ( 0.4–0.4 ), 0.4 | (57–58.9), 57.8   | ( 56.1–56.6 ), 56.5 | ( 0–0 ), 0     |
|        | MACAConventional | ( 2.4–2.4 ), 2.4 | ( 0–0 ), 0          | ( 6.4–6.5 ), 6.4 | ( 4.3–4.7 ),<br>4.4 | ( 22.1–27.7 ), 24.3 | ( 0.4–0.4 ), 0.4 | (59–62), 60.7     | ( 57.2–77.7 ), 64.6 | ( 0–0 ), 0     |
|        | MACACLIGEN75     | ( 0.5–0.6 ), 0.6 | ( 0.4–0.5 ),<br>0.5 | ( 0.4–0.5 ), 0.5 | ( 1.2–1.5 ),<br>1.4 | ( 1.9–3.2 ), 2.7    | ( 1.1–1.3 ), 1.2 | (12.6–16.9), 14.8 | ( 2.9–4.2 ), 3.6    | ( 0–0 ), 0     |
|        | MACACLIGEN90     | ( 1.8–2 ), 1.9   | ( 1.7–1.9 ),<br>1.8 | ( 1–1 ), 1       | ( 0.6–0.9 ),<br>0.8 | ( 0.3–1.3 ), 1      | ( 1.9–2.1 ), 1.9 | (0.2–0.4), 0.2    | ( 6–8 ), 7.1        | ( 0–0 ), 0     |
|        | MACALARSWG75     | ( 1.7–2.2 ), 2   | ( 1.2–1.8 ),<br>1.6 | ( 1.6–1.9 ), 1.8 | ( 1.3–1.8 ),<br>1.6 | ( 2.5–5.2 ), 3.6    | ( 1–1.3 ), 1.1   | (4.7–8), 6.3      | ( 12–15.6 ), 13.5   | ( 0–0 ), 0     |
|        | MACALARSWG90     | ( 6.8–7.6 ), 7.3 | ( 6.3–7 ), 6.7      | ( 3.7–4.2 ), 4   | ( 0.8–1.1 ),<br>0.9 | ( 0.7–2.5 ), 1.3    | ( 1.7–1.9 ), 1.8 | (0–0.1), 0        | ( 24.7–35.2 ), 29.5 | ( 0–0.4 ), 0   |
| Spring | Observed         | 3.2              | 0.0                 | 7.7              | 4.7                 | 35.6                | 0.4              | 60.4              | 111.8               | 0.0            |
|        | MACANoTreatment  | ( 3.2–3.3 ), 3.2 | ( 0.3–0.3 ),<br>0.3 | ( 6.4–6.7 ), 6.5 | ( 3.4–3.7 ),<br>3.6 | ( 14.9–18.7 ), 17.1 | ( 0.5–0.5 ), 0.5 | (47.8–48.8), 48.3 | ( 57.2–69.9 ), 65.7 | ( 0–0 ), 0     |
|        | MACAConventional | ( 2.8–2.8 ), 2.8 | ( 0–0.1 ), 0        | ( 6.5–6.6 ), 6.6 | ( 4.3–4.7 ),<br>4.5 | ( 25.1–30 ), 27.8   | ( 0.4–0.4 ), 0.4 | (50–51.1), 50.5   | ( 74.2–87.6 ), 79.5 | ( 0–0 ), 0     |
|        | MACACLIGEN75     | ( 0.9–1 ), 0.9   | ( 0.7–0.9 ),<br>0.8 | ( 0.6–0.6 ), 0.6 | ( 0.9–1.2 ),<br>1.1 | ( 1.1–2.5 ), 1.6    | ( 1.5–1.7 ), 1.6 | (2.2–3.8), 3      | ( 3.7–4.5 ), 4.2    | ( 0–0 ), 0     |
|        | MACACLIGEN90     | ( 2.3–2.5 ), 2.4 | ( 2.2–2.4 ),<br>2.3 | ( 1.1–1.1 ), 1.1 | ( 0.7–0.9 ),<br>0.8 | ( 0.4–1.3 ), 0.8    | ( 2.1–2.3 ), 2.2 | (0–0.1), 0        | ( 7.1–9.2 ), 8.2    | ( 0–0.3 ), 0.1 |
|        | MACALARSWG75     | ( 3.1–3.8 ), 3.5 | ( 2.7–3.4 ),<br>3.1 | ( 2.1–2.3 ), 2.2 | ( 1–1.4 ), 1.1      | ( 1.3–3.7 ), 2      | ( 1.4–1.8 ), 1.6 | (0.5–2.4), 0.9    | ( 14.8–22.1 ), 16.5 | ( 0–0 ), 0     |
|        | MACALARSWG90     | ( 9–9.8 ), 9.5   | ( 8.4–9.2 ),<br>8.9 | ( 4.3–4.7 ), 4.5 | ( 0.8–1.1 ),<br>0.9 | ( 0.7–3.4 ), 1.6    | ( 2–2.2 ), 2.1   | (0–0), 0          | ( 32.8–49 ), 37.5   | ( 0–1.3 ), 0.4 |
| Summer | Observed         | 2.8              | 0.0                 | 7.8              | 4.1                 | 20.4                | 0.4              | 69.1              | 71.9                | 0.0            |
|        | MACANoTreatment  | ( 2.9–3 ), 2.9   | ( 0–0 ), 0          | ( 6.5–6.8 ), 6.7 | ( 3.8–4.2 ), 4      | ( 19–23.5 ), 21.7   | ( 0.4–0.5 ), 0.4 | (55.7–57.6), 56.5 | ( 65–74.5 ), 72.1   | ( 0–0 ), 0     |

|             |                  |                  |                  |                  |                  |                       |                  |                   |                        |                |
|-------------|------------------|------------------|------------------|------------------|------------------|-----------------------|------------------|-------------------|------------------------|----------------|
|             | MACAConventional | ( 3.1–3.1 ), 3.1 | ( 0–0 ), 0       | ( 8.3–8.4 ), 8.3 | ( 5.1–5.8 ), 5.4 | ( 34.5–47.6 ), 40.9   | ( 0.4–0.4 ), 0.4 | (51.6–53), 52     | ( 92.7–127.6 ), 108.5  | ( 0–0 ), 0     |
|             | MACACLIGEN75     | ( 0.7–0.8 ), 0.8 | ( 0.5–0.7 ), 0.6 | ( 0.5–0.6 ), 0.6 | ( 1.1–1.4 ), 1.2 | ( 1.7–3.3 ), 2.3      | ( 1.2–1.3 ), 1.3 | (10.5–14.2), 11.7 | ( 3.6–5.4 ), 4.5       | ( 0–0 ), 0     |
|             | MACACLIGEN90     | ( 2.2–2.4 ), 2.3 | ( 2–2.2 ), 2.2   | ( 1.2–1.3 ), 1.2 | ( 0.7–0.9 ), 0.8 | ( 0.4–1.3 ), 0.8      | ( 1.8–2 ), 1.9   | (0.1–0.3), 0.2    | ( 7.7–11.8 ), 8.7      | ( 0–0 ), 0     |
|             | MACALARSWG75     | ( 2.5–3.1 ), 2.8 | ( 2–2.8 ), 2.4   | ( 2.1–2.3 ), 2.2 | ( 1.1–1.5 ), 1.3 | ( 1.8–4 ), 2.6        | ( 1.2–1.4 ), 1.3 | (3.1–7.3), 5.1    | ( 15.2–22.9 ), 17.9    | ( 0–0 ), 0     |
|             | MACALARSWG90     | ( 8.4–9.5 ), 8.8 | ( 7.5–8.6 ), 8   | ( 4.7–5 ), 4.8   | ( 0.9–1.1 ), 1   | ( 0.9–2.7 ), 1.7      | ( 1.8–1.9 ), 1.8 | (0–0.1), 0        | ( 30.7–49.8 ), 38.5    | ( 0–0.5 ), 0.1 |
| Winter      | Observed         | 1.9              | 0.0              | 4.7              | 4.6              | 33.8                  | 0.4              | 61.6              | 77.0                   | 0.0            |
|             | MACANoTreatment  | ( 1.9–2 ), 1.9   | ( 0–0 ), 0       | ( 4.5–4.8 ), 4.7 | ( 4.1–4.6 ), 4.5 | ( 23–31.5 ), 28.7     | ( 0.4–0.4 ), 0.4 | (56.6–58.1), 57.2 | ( 52.1–57 ), 56.3      | ( 0–0 ), 0     |
|             | MACAConventional | ( 1.9–1.9 ), 1.9 | ( 0–0 ), 0       | ( 4.9–5 ), 4.9   | ( 5–5.4 ), 5.2   | ( 35–42.9 ), 39.6     | ( 0.4–0.4 ), 0.4 | (56.1–57.1), 56.7 | ( 63.5–71.6 ), 66.4    | ( 0–0 ), 0     |
|             | MACACLIGEN75     | ( 0.4–0.5 ), 0.5 | ( 0.4–0.4 ), 0.4 | ( 0.3–0.4 ), 0.4 | ( 1.3–1.7 ), 1.5 | ( 2.7–4.6 ), 3.5      | ( 1.2–1.4 ), 1.2 | (12.5–16.8), 15.1 | ( 2.6–3.4 ), 3.1       | ( 0–0 ), 0     |
|             | MACACLIGEN90     | ( 1.4–1.6 ), 1.5 | ( 1.2–1.5 ), 1.4 | ( 0.8–0.9 ), 0.9 | ( 0.8–1.1 ), 1   | ( 0.5–2.2 ), 1.4      | ( 1.6–1.9 ), 1.7 | (0.1–0.3), 0.2    | ( 5.4–8.5 ), 7.2       | ( 0–0 ), 0     |
|             | MACALARSWG75     | ( 1.4–2 ), 1.6   | ( 1.1–1.7 ), 1.3 | ( 1.3–1.4 ), 1.4 | ( 1.7–2 ), 1.8   | ( 5–6.5 ), 5.4        | ( 1.1–1.4 ), 1.2 | (3.9–7.7), 5.1    | ( 10.7–13.9 ), 11.9    | ( 0–0 ), 0     |
|             | MACALARSWG90     | ( 5.5–6 ), 5.8   | ( 4.7–5.5 ), 5.1 | ( 3.3–3.5 ), 3.5 | ( 0.9–1.2 ), 1.1 | ( 1–3 ), 1.8          | ( 1.6–1.8 ), 1.7 | (0–0.1), 0        | ( 21.8–35.9 ), 27.7    | ( 0–0.3 ), 0.1 |
| Norwalk, OH |                  |                  |                  |                  |                  |                       |                  |                   |                        |                |
| Daily       | Observed         | 2.6              | 0.0              | 7.0              | 7.5              | 133.0                 | 0.4              | 64                | 229.1                  | 0.0            |
|             | MACANoTreatment  | ( 2.6–2.7 ), 2.7 | ( 0–0 ), 0       | ( 5.4–5.7 ), 5.6 | ( 3.4–4 ), 3.9   | ( 14.3–26.9 ), 23.8   | ( 0.5–0.5 ), 0.5 | (51–51.7), 51.4   | ( 54.5–112.8 ), 101.6  | ( 0–0 ), 0     |
|             | MACAConventional | ( 2.6–2.6 ), 2.6 | ( 0–0 ), 0       | ( 6.9–7 ), 7     | ( 5.6–8.2 ), 7.3 | ( 48.4–166.3 ), 122.6 | ( 0.4–0.4 ), 0.4 | (51–51.7), 51.4   | ( 133.7–258.4 ), 220.7 | ( 0–0 ), 0     |
|             | MACACLIGEN75     | ( 0.7–0.8 ), 0.8 | ( 0.6–0.7 ), 0.7 | ( 0.5–0.6 ), 0.5 | ( 1.1–1.3 ), 1.2 | ( 1.7–2.7 ), 2.2      | ( 1.4–1.5 ), 1.4 | (5.2–6.3), 5.7    | ( 3.8–4.8 ), 4.3       | ( 0–0 ), 0     |
|             | MACACLIGEN90     | ( 2–2.1 ), 2     | ( 1.8–2 ), 1.9   | ( 1–1 ), 1       | ( 0.7–1 ), 0.9   | ( 0.7–2.2 ), 1.2      | ( 1.9–2.1 ), 2   | (0–0.1), 0.1      | ( 7.9–13.6 ), 9        | ( 0–0 ), 0     |
|             | MACALARSWG75     | ( 2.6–2.9 ), 2.7 | ( 2.1–2.5 ), 2.3 | ( 1.9–2 ), 2     | ( 1.4–1.6 ), 1.5 | ( 2.8–4.1 ), 3.3      | ( 1.3–1.4 ), 1.4 | (1.3–2.2), 1.8    | ( 15–21.2 ), 17.9      | ( 0–0 ), 0     |
|             | MACALARSWG90     | ( 7.6–8.2 ), 7.9 | ( 6.9–7.5 ), 7.2 | ( 4.2–4.5 ), 4.3 | ( 0.8–1 ), 0.9   | ( 0.8–1.4 ), 1.1      | ( 1.8–1.9 ), 1.8 | (0–0), 0          | ( 31.9–37.7 ), 34.3    | ( 0–0.3 ), 0.1 |
| Fall        | Observed         | 2.3              | 0.0              | 5.5              | 4.0              | 21.3                  | 0.4              | 63.6              | 57.4                   | 0.0            |
|             | MACANoTreatment  | ( 2.3–2.4 ), 2.4 | ( 0–0 ), 0       | ( 5.1–5.3 ), 5.2 | ( 3.6–3.8 ), 3.7 | ( 16.3–18.6 ), 17.2   | ( 0.4–0.5 ), 0.5 | (53.2–54.5), 53.8 | ( 46.1–47.3 ), 47.1    | ( 0–0 ), 0     |

|        |                  |                  |                     |                  |                     |                          |                  |                   |                        |                     |
|--------|------------------|------------------|---------------------|------------------|---------------------|--------------------------|------------------|-------------------|------------------------|---------------------|
|        | MACAConventional | ( 2.2–2.3 ), 2.2 | ( 0–0 ), 0          | ( 5.5–5.5 ), 5.5 | ( 4.2–4.4 ),<br>4.3 | ( 22.8–25.6 ), 24.3      | ( 0.4–0.4 ), 0.4 | (53.2–54.5), 53.8 | ( 53.1–61.4 ), 56.4    | ( 0–0 ), 0          |
|        | MACACLIGEN75     | ( 0.6–0.7 ), 0.7 | ( 0.4–0.6 ),<br>0.5 | ( 0.4–0.5 ), 0.5 | ( 1–1.4 ), 1.3      | ( 1.6–3.3 ), 2.2         | ( 1.3–1.5 ), 1.4 | (7.2–9.4), 8.1    | ( 2.9–4.5 ), 3.5       | ( 0–0 ), 0          |
|        | MACACLIGEN90     | ( 1.9–2 ), 1.9   | ( 1.7–1.8 ),<br>1.8 | ( 0.9–1 ), 0.9   | ( 0.7–0.9 ),<br>0.8 | ( 0.4–1.5 ), 1           | ( 2–2.2 ), 2.1   | (0–0.1), 0.1      | ( 5.6–8.2 ), 7         | ( 0–0 ), 0          |
|        | MACALARSWG75     | ( 1.9–2.4 ), 2.2 | ( 1.5–2.1 ),<br>1.8 | ( 1.5–1.7 ), 1.6 | ( 1.3–1.7 ),<br>1.6 | ( 2.5–5.4 ), 3.9         | ( 1.2–1.5 ), 1.3 | (2.1–4.7), 2.8    | ( 11.2–14.5 ), 12.7    | ( 0–0 ), 0          |
|        | MACALARSWG90     | ( 6.8–7.4 ), 7.1 | ( 6.1–6.8 ),<br>6.5 | ( 3.8–4 ), 3.9   | ( 0.9–1.1 ), 1      | ( 0.9–1.8 ), 1.3         | ( 1.7–1.9 ), 1.8 | (0–0), 0          | ( 25.6–33.5 ), 29.7    | ( 0–0.7 ), 0.2      |
| Spring | Observed         | 3.2              | 0.0                 | 7.2              | 3.7                 | 19.9                     | 0.4              | 60                | 87.6                   | 0.0                 |
|        | MACANoTreatment  | ( 3.2–3.3 ), 3.2 | ( 0.4–0.5 ),<br>0.4 | ( 5.9–6.1 ), 6   | ( 2.8–3.2 ),<br>3.1 | ( 9.3–14.2 ), 12.5       | ( 0.5–0.5 ), 0.5 | (46.1–47.4), 46.9 | ( 44.1–70.5 ), 63.3    | ( 0–0 ), 0          |
|        | MACAConventional | ( 3.2–3.2 ), 3.2 | ( 0.1–0.2 ),<br>0.1 | ( 7.6–7.9 ), 7.8 | ( 4.2–6.7 ),<br>5.6 | ( 23–94.7 ), 58.8        | ( 0.4–0.4 ), 0.4 | (46.1–47.4), 46.9 | ( 74.8–187 ), 146.7    | ( 0–0 ), 0          |
|        | MACACLIGEN75     | ( 0.9–1.1 ), 1   | ( 0.8–1 ), 0.9      | ( 0.6–0.6 ), 0.6 | ( 0.8–1 ), 0.9      | ( 0.6–1.7 ), 1.2         | ( 1.6–1.8 ), 1.7 | (1–1.6), 1.3      | ( 3.8–4.7 ), 4.1       | ( 0–0 ), 0          |
|        | MACACLIGEN90     | ( 2.3–2.5 ), 2.4 | ( 2.2–2.4 ),<br>2.3 | ( 1–1 ), 1       | ( 0.6–0.8 ),<br>0.7 | ( 0.4–1.1 ), 0.7         | ( 2.3–2.5 ), 2.4 | (0–0), 0          | ( 6.9–8 ), 7.4         | ( 0.2–0.3 ),<br>0.2 |
|        | MACALARSWG75     | ( 3.5–3.9 ), 3.7 | ( 3.2–3.6 ),<br>3.4 | ( 2.1–2.2 ), 2.1 | ( 1.1–1.3 ),<br>1.2 | ( 1.7–3.3 ), 2.6         | ( 1.6–1.8 ), 1.7 | (0.1–0.7), 0.4    | ( 14.5–20.1 ), 17      | ( 0–0 ), 0          |
|        | MACALARSWG90     | ( 9.3–9.8 ), 9.5 | ( 8.6–9.2 ),<br>8.9 | ( 4.2–4.4 ), 4.3 | ( 0.8–1 ), 0.8      | ( 0.6–1.4 ), 0.9         | ( 2.1–2.3 ), 2.2 | (0–0), 0          | ( 28–32.9 ), 30.8      | ( 0.1–1 ), 0.6      |
| Summer | Observed         | 3.1              | 0.0                 | 9.5              | 8.7                 | 140.5                    | 0.3              | 68.7              | 229.1                  | 0.0                 |
|        | MACANoTreatment  | ( 3–3.1 ), 3     | ( 0–0 ), 0          | ( 6–6.6 ), 6.4   | ( 3.2–4.5 ),<br>4.2 | ( 13.3–38.6 ), 31.6      | ( 0.5–0.5 ), 0.5 | (50.3–52), 51.2   | ( 54.5–112.8 ), 101.6  | ( 0–0 ), 0          |
|        | MACAConventional | ( 3.1–3.1 ), 3.1 | ( 0–0 ), 0          | ( 8.9–9.1 ), 9   | ( 5.8–9.7 ),<br>8.2 | ( 47.1–195.9 ),<br>135.9 | ( 0.3–0.4 ), 0.3 | (50.3–52), 51.2   | ( 133.7–258.4 ), 220.7 | ( 0–0 ), 0          |
|        | MACACLIGEN75     | ( 0.8–1 ), 0.9   | ( 0.8–0.9 ),<br>0.8 | ( 0.5–0.6 ), 0.5 | ( 0.9–1.3 ),<br>1.1 | ( 1.2–3.4 ), 2.2         | ( 1.5–1.8 ), 1.6 | (4–6.1), 4.9      | ( 3.6–4.8 ), 4         | ( 0–0 ), 0          |
|        | MACACLIGEN90     | ( 2.1–2.4 ), 2.2 | ( 1.9–2.3 ),<br>2.1 | ( 1–1.1 ), 1.1   | ( 0.7–1.2 ),<br>0.9 | ( 0.7–4.8 ), 1.6         | ( 2–2.4 ), 2.1   | (0–0.1), 0.1      | ( 7.5–13.6 ), 9        | ( 0–0.2 ), 0        |
|        | MACALARSWG75     | ( 3–3.5 ), 3.2   | ( 2.6–3 ), 2.7      | ( 2–2.3 ), 2.2   | ( 1.1–1.5 ),<br>1.3 | ( 1.6–4 ), 2.5           | ( 1.3–1.6 ), 1.5 | (0.9–3.6), 1.8    | ( 12.7–21.2 ), 16.2    | ( 0–0 ), 0          |
|        | MACALARSWG90     | ( 8.9–9.6 ), 9.3 | ( 8.3–9.2 ),<br>8.8 | ( 4.3–4.7 ), 4.5 | ( 0.6–0.8 ),<br>0.7 | ( 0.2–1.2 ), 0.8         | ( 2–2.1 ), 2.1   | (0–0.1), 0        | ( 30.4–37.7 ), 33.9    | ( 0–0.7 ), 0.4      |
| Winter | Observed (MACA)  | 1.8              | 0.0                 | 4.6              | 4.5                 | 28.0                     | 0.4              | 63.8              | 55.9                   | 0.0                 |

|  |                  |                  |                     |                  |                     |                     |                  |                   |                     |                     |
|--|------------------|------------------|---------------------|------------------|---------------------|---------------------|------------------|-------------------|---------------------|---------------------|
|  | MACANoTreatment  | ( 1.9–2 ), 2     | ( 0–0 ), 0          | ( 4.3–4.7 ), 4.6 | ( 4–4.5 ), 4.3      | ( 20.5–26.5 ), 24.4 | ( 0.4–0.4 ), 0.4 | (53.1–54.7), 53.8 | ( 44.5–51.6 ), 50.8 | ( 0–0 ), 0          |
|  | MACAConventional | ( 1.8–1.8 ), 1.8 | ( 0–0 ), 0          | ( 4.6–4.7 ), 4.6 | ( 4.6–5.1 ),<br>4.8 | ( 27.2–35.1 ), 31.7 | ( 0.4–0.4 ), 0.4 | (53.1–54.7), 53.8 | ( 49.2–63.7 ), 57.4 | ( 0–0 ), 0          |
|  | MACACLIGEN75     | ( 0.5–0.6 ), 0.5 | ( 0.4–0.5 ),<br>0.4 | ( 0.3–0.4 ), 0.4 | ( 1.2–1.5 ),<br>1.4 | ( 2.4–4 ), 3.1      | ( 1.4–1.6 ), 1.5 | (6.8–9.5), 8.3    | ( 2.5–3.1 ), 2.7    | ( 0–0 ), 0          |
|  | MACACLIGEN90     | ( 1.5–1.6 ), 1.5 | ( 1.3–1.5 ),<br>1.4 | ( 0.7–0.8 ), 0.8 | ( 0.8–1 ), 0.9      | ( 0.8–1.4 ), 1.1    | ( 1.8–2 ), 1.9   | (0.1–0.1), 0.1    | ( 5.3–7 ), 6.2      | ( 0–0 ), 0          |
|  | MACALARSWG75     | ( 1.7–2 ), 1.9   | ( 1.4–1.8 ),<br>1.6 | ( 1.2–1.4 ), 1.3 | ( 1.5–1.7 ),<br>1.5 | ( 3.1–5.1 ), 3.7    | ( 1.3–1.5 ), 1.4 | (1.7–2.9), 2.3    | ( 9.3–13.3 ), 11.1  | ( 0–0 ), 0          |
|  | MACALARSWG90     | ( 5.5–6.1 ), 5.8 | ( 4.9–5.5 ),<br>5.2 | ( 3.1–3.4 ), 3.3 | ( 1–1.4 ), 1.2      | ( 1.3–4.2 ), 2.5    | ( 1.7–1.8 ), 1.8 | (0–0), 0          | ( 23.5–34.3 ), 28.3 | ( 0.1–0.5 ),<br>0.3 |

**Table S9.** Statistical properties of daily precipitation, mm, presented on a seasonal basis for Adrian, MI, Fort Wayne, IN, and Norwalk, OH from the MACA climate projections for two different future climate scenarios (RCP 4.5 and RCP 8.5), treated with power transformation bias correction method and default publicly available dataset for period from 2006–2099 compared with observed data.

|                |                  |            |                  |                  |                     |                  |                                       |                       |            |
|----------------|------------------|------------|------------------|------------------|---------------------|------------------|---------------------------------------|-----------------------|------------|
| FALL           |                  |            |                  |                  |                     |                  |                                       |                       |            |
| Adrian, MI     |                  |            |                  |                  |                     |                  |                                       |                       |            |
| Dataset        | Mean             | Median     | Std. Dev.        | Skewness         | Kurtosis            | CV               | No. of days with no Precipitation (%) | Maximum               | Minimum    |
| Observed       | 2.3              | 0.0        | 5.7              | 4.1              | 21.0                | 0.4              | 65.2                                  | 59.4                  | 0.0        |
| RCP4.5         | ( 2.3–2.7 ), 2.4 | ( 0–0 ), 0 | ( 5.4–6.3 ), 5.8 | ( 3.5–4.9 ), 4.3 | ( 14.5–39.4 ), 27   | ( 0.4–0.4 ), 0.4 | (53.9–56.1), 55                       | ( 52.1–117.3 ), 77.3  | ( 0–0 ), 0 |
| RCP4.5Treated  | ( 2.2–2.7 ), 2.5 | ( 0–0 ), 0 | ( 6–7.5 ), 6.7   | ( 4–6.7 ), 5.3   | ( 20.4–84.4 ), 43   | ( 0.4–0.4 ), 0.4 | (53.9–56.1), 55                       | ( 69.5–193.6 ), 108.5 | ( 0–0 ), 0 |
| RCP8.5         | ( 2.1–2.8 ), 2.4 | ( 0–0 ), 0 | ( 5.4–6.3 ), 5.9 | ( 3.7–5.3 ), 4.6 | ( 18.2–43.5 ), 30   | ( 0.4–0.4 ), 0.4 | (54–56.7), 55.8                       | ( 63.9–95.5 ), 79.8   | ( 0–0 ), 0 |
| RCP8.5Treated  | ( 2.1–2.9 ), 2.5 | ( 0–0 ), 0 | ( 6.1–7.5 ), 6.8 | ( 4.4–6.6 ), 5.6 | ( 26.3–66 ), 46.1   | ( 0.3–0.4 ), 0.4 | (54–56.7), 55.8                       | ( 81.6–136.2 ), 105.4 | ( 0–0 ), 0 |
| Fort Wayne, IN |                  |            |                  |                  |                     |                  |                                       |                       |            |
| Observed       | 2.3              | 0.0        | 6.0              | 4.4              | 25.1                | 0.4              | 62.9                                  | 68.3                  | 0.0        |
| RCP4.5         | ( 2.3–2.8 ), 2.5 | ( 0–0 ), 0 | ( 5.5–6.5 ), 6   | ( 3.4–4.7 ), 4.2 | ( 13.6–37.9 ), 24.6 | ( 0.4–0.4 ), 0.4 | (56.4–59), 57.9                       | ( 58.6–122.8 ), 76.8  | ( 0–0 ), 0 |
| RCP4.5Treated  | ( 2.3–2.8 ), 2.5 | ( 0–0 ), 0 | ( 6.1–7.5 ), 6.7 | ( 3.9–5.9 ), 5   | ( 19.6–60.9 ), 36.8 | ( 0.4–0.4 ), 0.4 | (56.4–59), 57.9                       | ( 75.9–155.4 ), 97.9  | ( 0–0 ), 0 |
| RCP8.5         | ( 2–2.9 ), 2.5   | ( 0–0 ), 0 | ( 5.3–6.5 ), 6.1 | ( 3.7–5.2 ), 4.5 | ( 19.5–47.8 ), 31.1 | ( 0.4–0.4 ), 0.4 | (57–59.9), 58.7                       | ( 70.7–136.6 ), 97.5  | ( 0–0 ), 0 |
| RCP8.5Treated  | ( 2–2.9 ), 2.5   | ( 0–0 ), 0 | ( 5.9–7.4 ), 6.9 | ( 4.5–6.5 ), 5.5 | ( 31.1–72.3 ), 47.1 | ( 0.3–0.4 ), 0.4 | (57–59.9), 58.7                       | ( 89.3–174.9 ), 126.3 | ( 0–0 ), 0 |
| Norwalk, OH    |                  |            |                  |                  |                     |                  |                                       |                       |            |
| Observed       | 2.3              | 0.0        | 5.5              | 4.0              | 21.3                | 0.4              | 63.6                                  | 57.4                  | 0.0        |
| RCP4.5         | ( 2.3–2.7 ), 2.5 | ( 0–0 ), 0 | ( 5.5–6.2 ), 5.8 | ( 3.6–4.3 ), 4   | ( 16.9–26.6 ), 21.5 | ( 0.4–0.4 ), 0.4 | (52.7–54.7), 53.7                     | ( 56.7–79.9 ), 69.8   | ( 0–0 ), 0 |
| RCP4.5Treated  | ( 2.2–2.6 ), 2.4 | ( 0–0 ), 0 | ( 5.8–6.9 ), 6.2 | ( 4.2–5 ), 4.7   | ( 26.4–36.8 ), 31.6 | ( 0.4–0.4 ), 0.4 | (52.7–54.7), 53.7                     | ( 66.6–113.2 ), 87    | ( 0–0 ), 0 |
| RCP8.5         | ( 2.1–2.9 ), 2.5 | ( 0–0 ), 0 | ( 5.2–6.3 ), 5.8 | ( 3.5–4.3 ), 4.1 | ( 15.6–25 ), 22.1   | ( 0.4–0.5 ), 0.4 | (53.3–55.4), 54.5                     | ( 57.6–77 ), 68       | ( 0–0 ), 0 |
| RCP8.5Treated  | ( 2–2.8 ), 2.4   | ( 0–0 ), 0 | ( 5.3–7 ), 6.3   | ( 4.1–5.2 ), 4.8 | ( 23.6–38.7 ), 32.6 | ( 0.4–0.4 ), 0.4 | (53.3–55.4), 54.5                     | ( 64.3–100.3 ), 87    | ( 0–0 ), 0 |

|                |                  |                |                  |                  |                      |                  |                                       |                        |            |
|----------------|------------------|----------------|------------------|------------------|----------------------|------------------|---------------------------------------|------------------------|------------|
| SPRING         |                  |                |                  |                  |                      |                  |                                       |                        |            |
| Adrian, MI     |                  |                |                  |                  |                      |                  |                                       |                        |            |
| Treatment      | Mean             | Median         | Std. Dev.        | Skewness         | Kurtosis             | CV               | No. of days with no Precipitation (%) | Maximum                | Minimum    |
| Observed       | 3.0              | 0.0            | 7.2              | 4.0              | 22.7                 | 0.4              | 63.5                                  | 80.3                   | 0.0        |
| RCP4.5         | ( 3–3.4 ), 3.2   | ( 0–0.3 ), 0.1 | ( 6.1–7.4 ), 6.7 | ( 3.4–4.6 ), 3.9 | ( 15.3–35.6 ), 23.3  | ( 0.5–0.5 ), 0.5 | (46.3–51.1), 49.6                     | ( 69.5–125.6 ), 94.7   | ( 0–0 ), 0 |
| RCP4.5Treated  | ( 2.9–3.5 ), 3.2 | ( 0–0.2 ), 0.1 | ( 6.9–9.1 ), 8.2 | ( 4.4–7.4 ), 5.5 | ( 27.1–113.1 ), 53.1 | ( 0.4–0.4 ), 0.4 | (46.3–51.1), 49.6                     | ( 100.8–249.7 ), 158.8 | ( 0–0 ), 0 |
| RCP8.5         | ( 3–3.5 ), 3.2   | ( 0–0.3 ), 0.2 | ( 6.4–7.4 ), 6.9 | ( 3.6–4.5 ), 3.9 | ( 17.5–33.3 ), 23.3  | ( 0.5–0.5 ), 0.5 | (47.7–51.4), 49.6                     | ( 83–122.1 ), 100.1    | ( 0–0 ), 0 |
| RCP8.5Treated  | ( 3–3.6 ), 3.3   | ( 0–0.2 ), 0.1 | ( 7.3–9.3 ), 8.5 | ( 4.7–6.3 ), 5.4 | ( 33.3–68.3 ), 47.9  | ( 0.4–0.4 ), 0.4 | (47.7–51.4), 49.6                     | ( 120.7–214.8 ), 158.9 | ( 0–0 ), 0 |
| Fort Wayne, IN |                  |                |                  |                  |                      |                  |                                       |                        |            |
| Observed       | 3.2              | 0.0            | 7.7              | 4.7              | 35.6                 | 0.4              | 60.4                                  | 111.8                  | 0.0        |



|               |                  |                  |                  |                   |                       |                  |                   |                        |            |
|---------------|------------------|------------------|------------------|-------------------|-----------------------|------------------|-------------------|------------------------|------------|
| RCP4.5        | ( 3.2–3.7 ), 3.4 | ( 0–0.4 ), 0.3   | ( 6.6–7.5 ), 7.1 | ( 3.4–4.2 ), 3.8  | ( 15.6–29.3 ), 21.8   | ( 0.5–0.5 ), 0.5 | (44.7–50.2), 47.5 | ( 78–124.5 ), 92.4     | ( 0–0 ), 0 |
| RCP4.5Treated | ( 3.2–3.8 ), 3.5 | ( 0–0.2 ), 0.1   | ( 7.8–9.4 ), 8.5 | ( 4.3–6.6 ), 5.3  | ( 26–89.2 ), 45.6     | ( 0.4–0.4 ), 0.4 | (44.7–50.2), 47.5 | ( 106–223.1 ), 145.5   | ( 0–0 ), 0 |
| RCP8.5        | ( 3.2–3.7 ), 3.4 | ( 0–0.4 ), 0.3   | ( 6.7–7.6 ), 7.2 | ( 3.7–4.3 ), 4    | ( 18.3–31.5 ), 23.4   | ( 0.5–0.5 ), 0.5 | (44.3–51.1), 48.3 | ( 72–110.2 ), 93.7     | ( 0–0 ), 0 |
| RCP8.5Treated | ( 3.2–3.8 ), 3.5 | ( 0–0.2 ), 0.1   | ( 7.9–9.3 ), 8.7 | ( 4.7–6.4 ), 5.3  | ( 29.5–71.8 ), 43.8   | ( 0.4–0.4 ), 0.4 | (44.3–51.1), 48.3 | ( 109.3–188.9 ), 141.3 | ( 0–0 ), 0 |
| Norwalk, OH   |                  |                  |                  |                   |                       |                  |                   |                        |            |
| Observed      | 3.2              | 0.0              | 7.2              | 3.7               | 19.9                  | 0.4              | 60                | 87.6                   | 0.0        |
| RCP4.5        | ( 3.1–3.6 ), 3.4 | ( 0.4–0.5 ), 0.4 | ( 6–6.7 ), 6.4   | ( 3–3.7 ), 3.3    | ( 10.8–23.6 ), 16.3   | ( 0.5–0.5 ), 0.5 | (43.8–47.5), 45.9 | ( 58.6–113.8 ), 86     | ( 0–0 ), 0 |
| RCP4.5Treated | ( 3–3.6 ), 3.4   | ( 0.1–0.2 ), 0.1 | ( 7.5–9.2 ), 8.6 | ( 4.4–12.9 ), 7.3 | ( 27.4–361.7 ), 135.1 | ( 0.4–0.4 ), 0.4 | (43.8–47.5), 45.9 | ( 108.4–340.2 ), 235   | ( 0–0 ), 0 |
| RCP8.5        | ( 3.2–3.7 ), 3.4 | ( 0.3–0.5 ), 0.4 | ( 6.2–7.1 ), 6.6 | ( 3.1–3.7 ), 3.3  | ( 12.1–20.5 ), 15.6   | ( 0.5–0.5 ), 0.5 | (43.7–48.2), 46.1 | ( 61.4–91.6 ), 80.6    | ( 0–0 ), 0 |
| RCP8.5Treated | ( 3.1–3.9 ), 3.4 | ( 0.1–0.2 ), 0.1 | ( 7.8–9.9 ), 8.8 | ( 4.9–7.4 ), 6.3  | ( 37.7–117.3 ), 83.5  | ( 0.4–0.4 ), 0.4 | (43.7–48.2), 46.1 | ( 136.6–274.2 ), 222   | ( 0–0 ), 0 |

SUMMER

|                |                  |                |                    |                    |                        |                  |                                       |                        |            |
|----------------|------------------|----------------|--------------------|--------------------|------------------------|------------------|---------------------------------------|------------------------|------------|
| Adrian, MI     |                  |                |                    |                    |                        |                  |                                       |                        |            |
|                | Mean             | Median         | Std. Dev.          | Skewness           | Kurtosis               | CV               | No. of days with no Precipitation (%) | Maximum                | Minimum    |
| Observed       | 2.8              | 0.0            | 7.9                | 5.1                | 38.4                   | 0.4              | 70.7                                  | 120.4                  | 0.0        |
| RCP4.5         | ( 2.6–3.2 ), 2.9 | ( 0–0 ), 0     | ( 5.9–6.9 ), 6.3   | ( 3.6–4.9 ), 4     | ( 19.3–40 ), 25.3      | ( 0.4–0.5 ), 0.5 | (51.3–54.9), 52.7                     | ( 65.7–127.3 ), 91.4   | ( 0–0 ), 0 |
| RCP4.5Treated  | ( 2.5–3 ), 2.8   | ( 0–0 ), 0     | ( 7.4–9.6 ), 8.3   | ( 5.9–10.2 ), 7.3  | ( 50.8–200.8 ), 93.4   | ( 0.3–0.4 ), 0.3 | (51.3–54.9), 52.7                     | ( 113.6–302.6 ), 191.2 | ( 0–0 ), 0 |
| RCP8.5         | ( 2.7–3 ), 2.9   | ( 0–0 ), 0     | ( 5.9–6.9 ), 6.4   | ( 3.6–4.6 ), 4     | ( 18.7–33 ), 23.6      | ( 0.4–0.5 ), 0.5 | (52.2–54.8), 53.6                     | ( 75.4–104.4 ), 87.2   | ( 0–0 ), 0 |
| RCP8.5Treated  | ( 2.6–3 ), 2.8   | ( 0–0 ), 0     | ( 7.6–9.4 ), 8.4   | ( 6.2–8.1 ), 7     | ( 60–132.4 ), 81.3     | ( 0.3–0.4 ), 0.3 | (52.2–54.8), 53.6                     | ( 155.3–258 ), 181.3   | ( 0–0 ), 0 |
| Fort Wayne, IN |                  |                |                    |                    |                        |                  |                                       |                        |            |
| Observed       | 2.8              | 0.0            | 7.8                | 4.1                | 20.4                   | 0.4              | 69.1                                  | 71.9                   | 0.0        |
| RCP4.5         | ( 2.6–3.3 ), 3   | ( 0–0 ), 0     | ( 6.2–7.4 ), 6.8   | ( 3.8–6.5 ), 4.6   | ( 19.9–106.4 ), 36.5   | ( 0.4–0.5 ), 0.4 | (53.7–57.1), 55.1                     | ( 81.9–208.6 ), 107.5  | ( 0–0 ), 0 |
| RCP4.5Treated  | ( 2.5–3.4 ), 3   | ( 0–0 ), 0     | ( 8.4–10.1 ), 9.3  | ( 5.6–15.3 ), 7.8  | ( 43.7–544.6 ), 127.4  | ( 0.3–0.3 ), 0.3 | (53.7–57.1), 55.1                     | ( 134.9–454.6 ), 208.7 | ( 0–0 ), 0 |
| RCP8.5         | ( 2.6–3.1 ), 2.9 | ( 0–0 ), 0     | ( 5.9–7.5 ), 6.9   | ( 4.1–5.1 ), 4.6   | ( 22.4–46.7 ), 32.2    | ( 0.4–0.4 ), 0.4 | (54.5–57.4), 56.3                     | ( 77.8–151.2 ), 106.4  | ( 0–0 ), 0 |
| RCP8.5Treated  | ( 2.5–3.2 ), 3   | ( 0–0 ), 0     | ( 7.6–10.5 ), 9.4  | ( 5.8–8.8 ), 7.2   | ( 47.5–149.8 ), 85.2   | ( 0.3–0.3 ), 0.3 | (54.5–57.4), 56.3                     | ( 151.5–293.8 ), 204.8 | ( 0–0 ), 0 |
| Norwalk, OH    |                  |                |                    |                    |                        |                  |                                       |                        |            |
| Observed       | 3.1              | 0.0            | 9.5                | 8.7                | 140.5                  | 0.3              | 68.7                                  | 229.1                  | 0.0        |
| RCP4.5         | ( 2.7–3.3 ), 3   | ( 0–0.3 ), 0.2 | ( 6–7.2 ), 6.5     | ( 4–5.4 ), 4.6     | ( 28–66.7 ), 40        | ( 0.4–0.5 ), 0.5 | (49.1–53.5), 50.5                     | ( 100.7–166.3 ), 123.3 | ( 0–0 ), 0 |
| RCP4.5Treated  | ( 2.7–3.4 ), 3.2 | ( 0–0.1 ), 0   | ( 8.4–12.2 ), 9.8  | ( 8.2–13.6 ), 10.1 | ( 120.1–387.6 ), 207.3 | ( 0.3–0.4 ), 0.3 | (49.1–53.5), 50.5                     | ( 214–461.7 ), 306.9   | ( 0–0 ), 0 |
| RCP8.5         | ( 2.9–3.3 ), 3   | ( 0–0.3 ), 0.1 | ( 6.2–7.3 ), 6.8   | ( 4.1–6.7 ), 5.2   | ( 26.7–99.4 ), 55.1    | ( 0.4–0.5 ), 0.5 | (49.3–53), 50.9                       | ( 89.8–200.1 ), 145    | ( 0–0 ), 0 |
| RCP8.5Treated  | ( 2.9–3.5 ), 3.2 | ( 0–0.1 ), 0   | ( 8.6–11.8 ), 10.5 | ( 8–17.2 ), 12.6   | ( 124.3–604.5 ), 324.5 | ( 0.3–0.3 ), 0.3 | (49.3–53), 50.9                       | ( 255.4–536.9 ), 381.9 | ( 0–0 ), 0 |

WINTER

|            |
|------------|
| Adrian, MI |
|------------|

|                 | Mean             | Median     | Std. Dev.        | Skewness         | Kurtosis            | CV               | No. of days with no Precipitation (%) | Maximum               | Minimum    |
|-----------------|------------------|------------|------------------|------------------|---------------------|------------------|---------------------------------------|-----------------------|------------|
| Observed (MACA) | 1.7              | 0.0        | 4.6              | 4.8              | 32.8                | 0.4              | 68.1                                  | 59.7                  | 0.0        |
| RCP4.5          | ( 1.8–2.1 ), 2   | ( 0–0 ), 0 | ( 4.5–5.2 ), 4.9 | ( 4.4–5.2 ), 4.7 | ( 26.9–42.2 ), 32.7 | ( 0.4–0.4 ), 0.4 | (53.9–56.2), 54.9                     | ( 53.6–103.5 ), 72.5  | ( 0–0 ), 0 |
| RCP4.5Treated   | ( 1.7–2 ), 1.9   | ( 0–0 ), 0 | ( 4.6–5.5 ), 5.2 | ( 5.1–6.4 ), 5.7 | ( 36.3–70 ), 48.8   | ( 0.4–0.4 ), 0.4 | (53.9–56.2), 54.9                     | ( 70.5–130 ), 89.2    | ( 0–0 ), 0 |
| RCP8.5          | ( 1.9–2.3 ), 2.1 | ( 0–0 ), 0 | ( 4.6–5.6 ), 5.1 | ( 4.6–5.1 ), 4.8 | ( 31.5–40.1 ), 34.4 | ( 0.4–0.4 ), 0.4 | (53.8–56.9), 54.9                     | ( 64.2–92.1 ), 79.7   | ( 0–0 ), 0 |
| RCP8.5Treated   | ( 1.8–2.1 ), 2   | ( 0–0 ), 0 | ( 5–5.9 ), 5.5   | ( 5.4–6.3 ), 5.8 | ( 41.3–66.2 ), 52.3 | ( 0.4–0.4 ), 0.4 | (53.8–56.9), 54.9                     | ( 78.3–114.3 ), 100.1 | ( 0–0 ), 0 |
| Fort Wayne, IN  |                  |            |                  |                  |                     |                  |                                       |                       |            |
| Observed (MACA) | 1.9              | 0.0        | 4.7              | 4.6              | 33.8                | 0.4              | 61.6                                  | 77.0                  | 0.0        |
| RCP4.5          | ( 1.9–2.3 ), 2.1 | ( 0–0 ), 0 | ( 4.9–5.5 ), 5.2 | ( 4.2–6.1 ), 4.7 | ( 24.1–67.3 ), 34.8 | ( 0.4–0.4 ), 0.4 | (55.7–57.8), 56.6                     | ( 64.3–102 ), 76      | ( 0–0 ), 0 |
| RCP4.5Treated   | ( 1.9–2.2 ), 2.1 | ( 0–0 ), 0 | ( 5.1–5.9 ), 5.5 | ( 4.7–7.1 ), 5.4 | ( 29.8–88.2 ), 45.4 | ( 0.4–0.4 ), 0.4 | (55.7–57.8), 56.6                     | ( 71.1–117.9 ), 88.4  | ( 0–0 ), 0 |
| RCP8.5          | ( 2–2.4 ), 2.2   | ( 0–0 ), 0 | ( 5–5.7 ), 5.4   | ( 4–5.4 ), 4.7   | ( 21.3–51 ), 34.4   | ( 0.4–0.4 ), 0.4 | (55–58.1), 56.3                       | ( 60.5–109.8 ), 78.9  | ( 0–0 ), 0 |
| RCP8.5Treated   | ( 1.9–2.3 ), 2.2 | ( 0–0 ), 0 | ( 5.3–6.1 ), 5.7 | ( 4.5–6.3 ), 5.4 | ( 26.5–69.4 ), 45.1 | ( 0.4–0.4 ), 0.4 | (55–58.1), 56.3                       | ( 66.5–127.8 ), 90.7  | ( 0–0 ), 0 |
| Norwalk, OH     |                  |            |                  |                  |                     |                  |                                       |                       |            |
| Observed (MACA) | 1.8              | 0.0        | 4.6              | 4.5              | 28.0                | 0.4              | 63.8                                  | 55.9                  | 0.0        |
| RCP4.5          | ( 2.1–2.3 ), 2.2 | ( 0–0 ), 0 | ( 4.9–5.3 ), 5.1 | ( 4.1–5.3 ), 4.6 | ( 22.7–41.4 ), 30.4 | ( 0.4–0.4 ), 0.4 | (52.3–54.5), 53.2                     | ( 53.9–97 ), 74.2     | ( 0–0 ), 0 |
| RCP4.5Treated   | ( 1.9–2.1 ), 2   | ( 0–0 ), 0 | ( 5–5.6 ), 5.3   | ( 4.7–6.2 ), 5.4 | ( 29.3–62.2 ), 43.9 | ( 0.4–0.4 ), 0.4 | (52.3–54.5), 53.2                     | ( 64–116.6 ), 90.9    | ( 0–0 ), 0 |
| RCP8.5          | ( 2–2.5 ), 2.3   | ( 0–0 ), 0 | ( 4.9–5.7 ), 5.4 | ( 4–5.3 ), 4.6   | ( 20.1–41.9 ), 29.6 | ( 0.4–0.5 ), 0.4 | (52.3–54.6), 53.3                     | ( 55.5–89.5 ), 71.8   | ( 0–0 ), 0 |
| RCP8.5Treated   | ( 2–2.3 ), 2.1   | ( 0–0 ), 0 | ( 5.2–6 ), 5.6   | ( 4.4–6.2 ), 5.2 | ( 25.9–59.5 ), 40.5 | ( 0.4–0.4 ), 0.4 | (52.3–54.6), 53.3                     | ( 63.9–108.6 ), 87.7  | ( 0–0 ), 0 |

**Table S10.** Performance evaluation in simulating number of wet and dry days in a month for Adrian, MI, Fort Wayne, IN, and Norwalk, OH from the MACA climate projections for two different future climate scenarios (RCP 4.5 and RCP 8.5), treated with power transformation bias correction method and default publicly available dataset for period from 2006–2099 compared with observed data.

| Number of Wet Days in a Month |             |             |             |             |             |             |             |             |             |             |             |             |
|-------------------------------|-------------|-------------|-------------|-------------|-------------|-------------|-------------|-------------|-------------|-------------|-------------|-------------|
| Dataset                       | January     | February    | March       | April       | May         | June        | July        | August      | September   | October     | November    | December    |
| Adrian, MI                    |             |             |             |             |             |             |             |             |             |             |             |             |
| Observed                      | 10          | 8           | 10          | 11          | 11          | 10          | 9           | 8           | 9           | 10          | 10          | 11          |
| RCP4.5                        | (15–15), 15 | (11–12), 12 | (14–15), 15 | (15–17), 16 | (15–17), 16 | (14–16), 14 | (15–16), 15 | (14–15), 15 | (12–15), 14 | (13–14), 14 | (12–14), 13 | (14–15), 15 |
| RCP4.5Treated                 | (15–15), 15 | (11–12), 12 | (14–15), 15 | (15–17), 16 | (15–17), 16 | (13–16), 14 | (14–15), 14 | (13–14), 13 | (12–13), 13 | (13–14), 14 | (12–14), 13 | (14–15), 15 |
| RCP8.5                        | (15–15), 15 | (11–12), 12 | (13–15), 15 | (15–17), 16 | (15–18), 16 | (14–15), 14 | (14–16), 15 | (14–15), 15 | (13–16), 14 | (13–15), 13 | (12–13), 13 | (14–15), 15 |
| RCP8.5Treated                 | (15–15), 15 | (11–12), 12 | (13–15), 15 | (15–17), 16 | (15–18), 16 | (13–15), 14 | (13–15), 14 | (13–14), 13 | (12–14), 13 | (13–15), 13 | (12–13), 13 | (14–15), 15 |
| Fort Wayne, IN                |             |             |             |             |             |             |             |             |             |             |             |             |
| Observed                      | 12          | 10          | 12          | 13          | 12          | 10          | 10          | 10          | 9           | 10          | 12          | 13          |
| RCP4.5                        | (13–14), 14 | (11–12), 11 | (14–15), 14 | (15–16), 16 | (16–18), 17 | (14–18), 15 | (15–16), 15 | (13–15), 14 | (11–14), 12 | (12–13), 12 | (11–13), 12 | (14–15), 14 |
| RCP4.5Treated                 | (13–14), 14 | (11–12), 11 | (14–15), 14 | (15–16), 16 | (16–18), 17 | (14–18), 15 | (14–15), 14 | (12–13), 13 | (11–13), 11 | (12–13), 12 | (11–13), 12 | (14–15), 14 |
| RCP8.5                        | (13–14), 14 | (11–12), 11 | (13–16), 15 | (15–17), 16 | (16–18), 17 | (14–16), 15 | (14–15), 15 | (13–15), 14 | (11–14), 12 | (11–13), 12 | (11–12), 12 | (14–15), 14 |
| RCP8.5Treated                 | (13–14), 14 | (11–12), 11 | (13–16), 15 | (15–17), 16 | (16–18), 17 | (14–16), 15 | (13–15), 14 | (12–13), 13 | (11–14), 11 | (11–13), 12 | (11–12), 12 | (14–15), 14 |
| Norwalk, OH                   |             |             |             |             |             |             |             |             |             |             |             |             |
| Observed                      | 11          | 10          | 12          | 13          | 13          | 11          | 10          | 9           | 9           | 10          | 11          | 12          |
| RCP4.5                        | (14–15), 14 | (12–13), 13 | (14–16), 15 | (16–17), 17 | (16–18), 17 | (15–17), 16 | (16–17), 16 | (14–17), 16 | (13–15), 14 | (13–14), 13 | (13–14), 14 | (15–16), 16 |
| RCP4.5Treated                 | (14–15), 14 | (12–13), 13 | (14–16), 15 | (16–17), 17 | (16–18), 17 | (13–15), 14 | (14–15), 15 | (13–14), 14 | (13–15), 14 | (13–14), 13 | (13–14), 14 | (15–16), 16 |
| RCP8.5                        | (14–15), 14 | (12–13), 13 | (14–16), 15 | (16–18), 17 | (16–18), 17 | (15–17), 16 | (15–18), 16 | (15–16), 15 | (13–16), 14 | (12–14), 13 | (13–14), 14 | (15–16), 15 |
| RCP8.5Treated                 | (14–15), 14 | (12–13), 13 | (14–16), 15 | (16–18), 17 | (16–18), 17 | (13–14), 14 | (14–15), 15 | (13–14), 14 | (13–16), 14 | (12–14), 13 | (13–14), 14 | (15–16), 15 |
|                               |             |             |             |             |             |             |             |             |             |             |             |             |
| Number of Dry Days in a Month |             |             |             |             |             |             |             |             |             |             |             |             |
| Adrian, MI                    |             |             |             |             |             |             |             |             |             |             |             |             |
| Observed                      | 21          | 20          | 20          | 18          | 19          | 19          | 21          | 22          | 21          | 21          | 18          | 19          |
| RCP4.5                        | (16–17), 17 | (16–17), 17 | (16–17), 16 | (13–15), 14 | (14–16), 15 | (14–16), 16 | (16–16), 16 | (16–17), 16 | (15–18), 16 | (17–18), 17 | (16–18), 17 | (16–17), 16 |
| RCP4.5Treated                 | (16–17), 17 | (16–17), 17 | (16–17), 16 | (13–15), 14 | (14–16), 15 | (14–17), 16 | (16–17), 17 | (17–18), 18 | (17–18), 18 | (17–18), 17 | (16–18), 17 | (16–17), 16 |
| RCP8.5                        | (16–17), 16 | (16–17), 17 | (16–18), 16 | (13–15), 14 | (13–16), 15 | (15–17), 16 | (16–17), 16 | (16–17), 17 | (14–17), 17 | (17–18), 18 | (17–18), 17 | (16–17), 16 |

|                |             |             |             |             |             |             |             |             |             |             |             |             |
|----------------|-------------|-------------|-------------|-------------|-------------|-------------|-------------|-------------|-------------|-------------|-------------|-------------|
| RCP8.5Treated  | (16–17), 16 | (16–17), 17 | (16–18), 16 | (13–15), 14 | (13–16), 15 | (15–17), 16 | (16–18), 17 | (17–18), 18 | (16–18), 17 | (17–18), 18 | (17–18), 17 | (16–17), 16 |
| Fort Wayne, IN |             |             |             |             |             |             |             |             |             |             |             |             |
| Observed       | 19          | 18          | 19          | 17          | 19          | 20          | 21          | 22          | 21          | 21          | 18          | 18          |
| RCP4.5         | (17–18), 18 | (17–17), 17 | (16–18), 17 | (14–15), 14 | (13–15), 14 | (12–16), 15 | (15–17), 16 | (16–18), 17 | (17–19), 18 | (18–19), 19 | (17–19), 18 | (16–17), 17 |
| RCP4.5Treated  | (17–18), 18 | (17–17), 17 | (16–18), 17 | (14–15), 14 | (13–15), 14 | (12–16), 15 | (17–17), 17 | (18–19), 18 | (17–20), 19 | (18–19), 19 | (17–19), 18 | (16–17), 17 |
| RCP8.5         | (17–18), 18 | (16–17), 17 | (16–18), 16 | (13–15), 14 | (13–16), 14 | (14–17), 15 | (16–17), 16 | (16–18), 17 | (16–19), 18 | (18–20), 19 | (18–19), 18 | (16–17), 17 |
| RCP8.5Treated  | (17–18), 18 | (16–17), 17 | (16–18), 16 | (13–15), 14 | (13–16), 14 | (14–17), 15 | (17–18), 17 | (18–19), 18 | (16–19), 19 | (18–20), 19 | (18–19), 18 | (16–17), 17 |
| Norwalk, OH    |             |             |             |             |             |             |             |             |             |             |             |             |
| Observed       | 19          | 19          | 19          | 17          | 18          | 19          | 21          | 22          | 20          | 21          | 19          | 18          |
| RCP4.5         | (16–17), 17 | (15–16), 16 | (15–17), 16 | (13–14), 14 | (13–15), 14 | (13–15), 14 | (14–16), 15 | (14–17), 15 | (15–17), 16 | (17–18), 18 | (16–17), 16 | (15–16), 16 |
| RCP4.5Treated  | (16–17), 17 | (15–16), 16 | (15–17), 16 | (13–14), 14 | (13–15), 14 | (15–17), 16 | (16–17), 16 | (17–18), 17 | (15–17), 16 | (17–18), 18 | (16–17), 16 | (15–16), 16 |
| RCP8.5         | (16–17), 17 | (15–16), 16 | (15–17), 16 | (12–14), 13 | (14–15), 14 | (13–15), 14 | (13–16), 15 | (15–17), 16 | (14–17), 16 | (17–19), 18 | (16–17), 17 | (15–16), 16 |
| RCP8.5Treated  | (16–17), 17 | (15–16), 16 | (15–17), 16 | (12–14), 13 | (14–15), 14 | (16–17), 17 | (16–17), 16 | (17–19), 17 | (14–17), 16 | (17–19), 18 | (16–17), 17 | (15–16), 16 |

**Table S11.** Extreme event and general climate indices analysis for Adrian, MI; Fort Wayne, IN; and Norwalk, OH from the MACA climate projections for two different future climate scenarios (RCP 4.5 and RCP 8.5), treated with power transformation bias correction method and default publicly available dataset for period from 2006–2099 compared with observed data.

| Dataset               | Maximum Dry Length | Maximum Wet Length | Number of dry sequence | No. of wet sequence | No. of days for optimum growth of corn | Snow Days   | Pdd              | Pww              | Pwd              | Pdw              | Ld         | Lw         | Td         | Tw         |
|-----------------------|--------------------|--------------------|------------------------|---------------------|----------------------------------------|-------------|------------------|------------------|------------------|------------------|------------|------------|------------|------------|
| <b>Adrian, MI</b>     |                    |                    |                        |                     |                                        |             |                  |                  |                  |                  |            |            |            |            |
| Observed              | 26                 | 9                  | 33                     | 153                 | 51                                     | 30          | 0.7              | 0.5              | 0.3              | 0.5              | 4          | 1          | 1          | 4          |
| RCP4.5                | (20–37), 25        | (18–29), 21        | (15–49), 30            | (854–1057), 953     | (62–71), 66                            | (23–37), 31 | ( 0.6–0.7 ), 0.7 | ( 0.6–0.6 ), 0.6 | ( 0.3–0.4 ), 0.3 | ( 0.4–0.4 ), 0.4 | ( 3–3 ), 3 | ( 2–2 ), 2 | ( 2–3 ), 2 | ( 1–1 ), 1 |
| RCP4.5 Treated        | (21–45), 27        | (16–29), 20        | (22–58), 33            | (834–1024), 931     | (28–31), 29                            | (61–66), 62 | ( 0.6–0.7 ), 0.7 | ( 0.6–0.6 ), 0.6 | ( 0.3–0.4 ), 0.3 | ( 0.4–0.4 ), 0.4 | ( 3–3 ), 3 | ( 2–2 ), 2 | ( 2–3 ), 2 | ( 1–1 ), 1 |
| RCP8.5                | (20–46), 26        | (17–26), 21        | (20–61), 33            | (870–1082), 973     | (58–64), 61                            | (18–33), 27 | ( 0.6–0.7 ), 0.7 | ( 0.6–0.6 ), 0.6 | ( 0.3–0.4 ), 0.3 | ( 0.4–0.4 ), 0.4 | ( 3–3 ), 3 | ( 1–2 ), 2 | ( 2–3 ), 2 | ( 1–1 ), 1 |
| RCP8.5 Treated        | (20–46), 28        | (17–26), 20        | (23–70), 39            | (833–1071), 953     | (28–30), 29                            | (60–65), 62 | ( 0.6–0.7 ), 0.7 | ( 0.6–0.6 ), 0.6 | ( 0.3–0.4 ), 0.3 | ( 0.4–0.4 ), 0.4 | ( 3–3 ), 3 | ( 1–2 ), 2 | 2–3 ), 2   | ( 1–1 ), 1 |
| <b>Fort Wayne, IN</b> |                    |                    |                        |                     |                                        |             |                  |                  |                  |                  |            |            |            |            |
| Observed              | 30                 | 11                 | 16                     | 166                 | 63                                     | 33          | 0.7              | 0.5              | 0.3              | 0.5              | 3          | 1          | 1          | 3          |
| RCP4.5                | (22–45), 30        | (16–22), 19        | (32–73), 45            | (836–1039), 943     | (64–72), 67                            | (20–30), 27 | ( 0.7–0.7 ), 0.7 | ( 0.6–0.6 ), 0.6 | ( 0.3–0.3 ), 0.3 | ( 0.4–0.4 ), 0.4 | ( 3–3 ), 3 | ( 1–2 ), 2 | ( 2–2 ), 2 | ( 1–1 ), 1 |
| RCP4.5 Treated        | (22–45), 30        | (16–22), 18        | (37–81), 51            | (800–1019), 919     | (65–69), 67                            | (43–46), 44 | ( 0.7–0.7 ), 0.7 | ( 0.6–0.6 ), 0.6 | ( 0.3–0.3 ), 0.3 | ( 0.4–0.4 ), 0.4 | ( 3–3 ), 3 | ( 1–2 ), 2 | ( 2–2 ), 2 | ( 1–1 ), 1 |
| RCP8.5                | (23–41), 31        | (15–26), 22        | (38–80), 57            | (835–1082), 955     | (56–64), 61                            | (16–28), 23 | ( 0.7–0.7 ), 0.7 | ( 0.6–0.6 ), 0.6 | ( 0.3–0.3 ), 0.3 | ( 0.4–0.4 ), 0.4 | ( 3–4 ), 3 | ( 1–2 ), 1 | ( 2–2 ), 2 | ( 1–1 ), 1 |
| RCP8.5 Treated        | (27–41), 32        | (15–26), 22        | (43–86), 61            | (825–1072), 941     | (63–68), 66                            | (42–45), 43 | ( 0.7–0.7 ), 0.7 | ( 0.6–0.6 ), 0.6 | ( 0.3–0.3 ), 0.3 | ( 0.4–0.4 ), 0.4 | ( 3–4 ), 3 | ( 1–2 ), 1 | ( 2–2 ), 2 | ( 1–1 ), 1 |
| <b>Norwalk, OH</b>    |                    |                    |                        |                     |                                        |             |                  |                  |                  |                  |            |            |            |            |
| Observed              | 25                 | 18                 | 15                     | 183                 | 55                                     | 31          | 0.7              | 0.5              | 0.3              | 0.5              | 3          | 1          | 1          | 3          |
| RCP4.5                | (19–41), 26        | (16–25), 21        | (12–30), 20            | (919–1106), 1019    | (66–76), 70                            | (21–34), 29 | ( 0.6–0.7 ), 0.7 | ( 0.6–0.7 ), 0.6 | ( 0.3–0.4 ), 0.3 | ( 0.3–0.4 ), 0.4 | ( 3–3 ), 3 | ( 2–2 ), 2 | ( 2–3 ), 3 | ( 1–1 ), 1 |
| RCP4.5 Treated        | (19–41), 27        | (16–25), 20        | (13–33), 24            | (881–1078), 986     | (50–55), 53                            | (50–55), 53 | ( 0.6–0.7 ), 0.7 | ( 0.6–0.7 ), 0.6 | ( 0.3–0.4 ), 0.3 | ( 0.3–0.4 ), 0.4 | ( 3–3 ), 3 | ( 2–2 ), 2 | ( 2–3 ), 3 | ( 1–1 ), 1 |
| RCP8.5                | (22–34), 28        | (18–28), 22        | (17–44), 27            | (918–1153), 1029    | (59–68), 64                            | (17–31), 25 | ( 0.6–0.7 ), 0.7 | ( 0.6–0.7 ), 0.6 | ( 0.3–0.4 ), 0.3 | ( 0.3–0.4 ), 0.4 | ( 3–3 ), 3 | ( 2–2 ), 2 | ( 2–3 ), 2 | ( 1–1 ), 1 |
| RCP8.5 Treated        | (22–34), 29        | (18–27), 21        | (24–51), 32            | (870–1143), 996     | (51–54), 52                            | (50–54), 52 | ( 0.6–0.7 ), 0.7 | ( 0.6–0.7 ), 0.6 | ( 0.3–0.4 ), 0.3 | ( 0.3–0.4 ), 0.4 | ( 3–3 ), 3 | ( 2–2 ), 2 | ( 2–3 ), 2 | ( 1–1 ), 1 |

**Table S12.** Details of select statistical properties computed from nine different climate model projections for precipitation (mm) and maximum and minimum temperature (, °C) under medium and high emission scenarios (RCP 4.5 and RCP 8.5) for eight different stations in WLEB.

| Precipitation (mm) |                    |              |         |          |           |       |         |          |                    |              |         |          |           |       |         |          |
|--------------------|--------------------|--------------|---------|----------|-----------|-------|---------|----------|--------------------|--------------|---------|----------|-----------|-------|---------|----------|
| Dataset            | RCP 4.5            |              |         |          |           |       |         |          | RCP 8.5            |              |         |          |           |       |         |          |
|                    | Adrian             | BowlingGreen | Bucyrus | Defiance | FortWayne | Lima  | Norwalk | Sandusky | Adrian             | BowlingGreen | Bucyrus | Defiance | FortWayne | Lima  | Norwalk | Sandusky |
|                    | Mean               |              |         |          |           |       |         |          | Mean               |              |         |          |           |       |         |          |
| Observed           | 2.5                | 2.4          | 2.7     | 2.5      | 2.6       | 2.7   | 2.7     | 2.4      | 2.5                | 2.4          | 2.7     | 2.5      | 2.6       | 2.7   | 2.7     | 2.4      |
| CCSM4              | 2.5                | 2.4          | 2.7     | 2.6      | 2.6       | 2.7   | 2.6     | 2.2      | 2.5                | 2.4          | 2.8     | 2.6      | 2.7       | 2.8   | 2.6     | 2.2      |
| ESM2G              | 2.6                | 2.5          | 2.9     | 2.6      | 2.7       | 2.8   | 2.8     | 2.3      | 2.8                | 2.6          | 3.0     | 2.8      | 2.9       | 2.9   | 2.9     | 2.4      |
| ESM2M              | 2.7                | 2.6          | 2.9     | 2.7      | 2.8       | 2.9   | 2.8     | 2.4      | 3.1                | 2.6          | 3.0     | 2.7      | 2.8       | 2.9   | 2.9     | 2.4      |
| IPSLALR            | 2.6                | 2.5          | 2.8     | 2.6      | 2.7       | 2.8   | 2.7     | 2.3      | 2.6                | 2.5          | 2.8     | 2.7      | 2.7       | 2.8   | 2.7     | 2.3      |
| IPSLAMR            | 2.6                | 2.5          | 2.8     | 2.6      | 2.7       | 2.8   | 2.8     | 2.3      | 2.5                | 2.3          | 2.7     | 2.5      | 2.6       | 2.6   | 2.6     | 2.2      |
| MICROESM           | 2.7                | 2.6          | 3.0     | 2.7      | 2.8       | 2.9   | 2.8     | 2.3      | 2.7                | 2.5          | 2.9     | 2.6      | 2.7       | 2.8   | 2.8     | 2.3      |
| MICROESMCHEM       | 2.7                | 2.6          | 3.0     | 2.7      | 2.7       | 2.8   | 2.8     | 2.3      | 2.7                | 2.6          | 3.0     | 2.7      | 2.7       | 2.8   | 2.9     | 2.3      |
| NORES M1           | 2.5                | 2.4          | 2.9     | 2.6      | 2.6       | 2.7   | 2.7     | 2.2      | 2.7                | 2.6          | 3.1     | 2.8      | 2.8       | 2.9   | 2.9     | 2.3      |
| BCCCSM             | 2.5                | 2.4          | 3.1     | 2.7      | 2.6       | 2.9   | 2.6     | 2.3      | 2.7                | 2.6          | 3.2     | 2.9      | 2.8       | 3.1   | 2.8     | 2.5      |
|                    | Standard Deviation |              |         |          |           |       |         |          | Standard Deviation |              |         |          |           |       |         |          |
| Observed           | 6.6                | 6.6          | 7.1     | 7.0      | 6.9       | 7.1   | 7.1     | 6.9      | 6.6                | 6.6          | 7.1     | 7.0      | 6.9       | 7.1   | 7.1     | 6.9      |
| CCSM4              | 7.1                | 6.7          | 7.3     | 7.6      | 7.1       | 6.9   | 7.0     | 6.3      | 6.8                | 6.7          | 7.3     | 7.6      | 7.5       | 7.1   | 7.1     | 6.2      |
| ESM2G              | 7.6                | 7.2          | 7.9     | 7.6      | 7.7       | 7.3   | 8.1     | 6.8      | 7.9                | 7.6          | 8.5     | 8.4      | 7.8       | 7.7   | 8.8     | 7.1      |
| ESM2M              | 7.6                | 7.4          | 8.0     | 7.9      | 7.6       | 7.5   | 8.0     | 7.1      | 8.3                | 7.9          | 8.6     | 8.1      | 7.6       | 7.7   | 8.5     | 7.0      |
| IPSLALR            | 7.3                | 7.0          | 7.4     | 7.7      | 7.4       | 7.1   | 7.7     | 7.3      | 7.4                | 7.2          | 7.7     | 8.1      | 7.6       | 7.3   | 7.7     | 7.0      |
| IPSLAMR            | 6.9                | 7.1          | 7.3     | 7.6      | 7.4       | 7.1   | 7.3     | 6.4      | 7.1                | 7.0          | 7.2     | 7.7      | 7.5       | 6.9   | 7.5     | 6.5      |
| MICROESM           | 7.4                | 7.3          | 7.7     | 8.0      | 7.7       | 7.5   | 8.5     | 6.4      | 7.5                | 7.2          | 7.4     | 7.8      | 7.3       | 7.2   | 8.3     | 6.5      |
| MICROESMCHEM       | 7.5                | 7.4          | 7.5     | 7.8      | 7.3       | 7.1   | 8.0     | 6.4      | 7.5                | 7.5          | 7.6     | 8.1      | 7.4       | 7.2   | 8.7     | 6.8      |
| NORES M1           | 6.8                | 6.8          | 7.4     | 7.6      | 7.1       | 7.1   | 7.6     | 6.4      | 7.3                | 7.4          | 8.2     | 8.3      | 7.6       | 7.7   | 7.9     | 6.6      |
| BCCCSM             | 7.1                | 6.8          | 8.0     | 8.2      | 7.1       | 7.6   | 7.2     | 6.8      | 7.7                | 7.4          | 8.8     | 8.9      | 7.7       | 8.2   | 8.2     | 7.3      |
|                    |                    |              |         |          |           |       |         |          |                    |              |         |          |           |       |         |          |
|                    | Maximum            |              |         |          |           |       |         |          | Maximum            |              |         |          |           |       |         |          |
| Observed           | 120.4              | 114.0        | 220.5   | 254.0    | 111.8     | 129.0 | 229.1   | 152.7    | 120.4              | 114.0        | 220.5   | 254.0    | 111.8     | 129.0 | 229.1   | 152.7    |
| CCSM4              | 302.6              | 195.7        | 248.4   | 210.6    | 126.2     | 158.7 | 314.7   | 196.4    | 173.3              | 182.8        | 174.9   | 182.5    | 234.6     | 217.4 | 284.0   | 231.9    |
| ESM2G              | 268.7              | 152.2        | 243.5   | 167.6    | 231.0     | 147.7 | 282.6   | 252.2    | 215.2              | 246.2        | 378.7   | 264.5    | 174.8     | 215.5 | 536.9   | 232.0    |
| ESM2M              | 197.6              | 215.8        | 208.8   | 168.6    | 123.7     | 184.2 | 340.2   | 425.2    | 328.1              | 366.7        | 290.3   | 328.3    | 171.0     | 215.4 | 400.2   | 253.3    |

|                           |                    |              |         |          |           |       |         |          |                    |              |         |          |           |       |         |          |
|---------------------------|--------------------|--------------|---------|----------|-----------|-------|---------|----------|--------------------|--------------|---------|----------|-----------|-------|---------|----------|
| IPSLALR                   | 249.7              | 147.7        | 205.5   | 191.3    | 326.5     | 201.1 | 399.5   | 644.5    | 172.6              | 163.7        | 158.5   | 168.8    | 222.0     | 156.3 | 255.4   | 334.5    |
| IPSLAMR                   | 172.5              | 215.2        | 155.1   | 214.8    | 154.3     | 182.7 | 268.6   | 208.9    | 184.9              | 192.5        | 153.2   | 238.9    | 173.4     | 173.0 | 339.6   | 243.8    |
| MICROESM                  | 211.7              | 189.6        | 200.0   | 241.7    | 268.8     | 235.1 | 461.7   | 225.9    | 214.8              | 157.6        | 147.1   | 230.5    | 159.2     | 185.2 | 342.4   | 303.3    |
| MICROESMCHEM              | 193.6              | 186.7        | 197.0   | 192.7    | 159.8     | 136.1 | 301.6   | 242.9    | 157.5              | 142.8        | 146.2   | 156.9    | 180.5     | 144.5 | 432.9   | 287.6    |
| NORES M1                  | 169.3              | 164.1        | 162.8   | 204.6    | 181.7     | 139.8 | 332.1   | 265.6    | 160.7              | 217.6        | 288.1   | 226.1    | 220.9     | 309.7 | 366.1   | 177.3    |
| BCCCSM                    | 164.2              | 199.2        | 250.9   | 276.6    | 120.1     | 211.9 | 215.3   | 276.0    | 182.5              | 257.5        | 313.0   | 431.9    | 137.0     | 215.2 | 479.8   | 264.0    |
|                           |                    |              |         |          |           |       |         |          |                    |              |         |          |           |       |         |          |
| Maximum Temperature, , °C |                    |              |         |          |           |       |         |          |                    |              |         |          |           |       |         |          |
|                           | RCP 4.5            |              |         |          |           |       |         |          | RCP 8.5            |              |         |          |           |       |         |          |
|                           | Adrian             | BowlingGreen | Bucyrus | Defiance | FortWayne | Lima  | Norwalk | Sandusky | Adrian             | BowlingGreen | Bucyrus | Defiance | FortWayne | Lima  | Norwalk | Sandusky |
|                           | Mean               |              |         |          |           |       |         |          | Mean               |              |         |          |           |       |         |          |
| Observed                  | 15.0               | 15.5         | 15.1    | 15.4     | 15.5      | 15.9  | 15.0    | 14.4     | 15.0               | 15.5         | 15.1    | 15.4     | 15.5      | 15.9  | 15.0    | 14.4     |
| CCSM4                     | 17.6               | 17.9         | 17.8    | 17.9     | 18.0      | 18.4  | 17.5    | 17.1     | 18.7               | 19.0         | 18.8    | 19.0     | 19.1      | 19.5  | 18.5    | 18.1     |
| ESM2G                     | 17.0               | 17.3         | 17.2    | 17.3     | 17.4      | 17.9  | 16.9    | 16.5     | 18.0               | 18.3         | 18.2    | 18.3     | 18.3      | 18.8  | 17.9    | 17.5     |
| ESM2M                     | 16.7               | 17.0         | 16.9    | 17.0     | 17.0      | 17.5  | 16.6    | 16.2     | 18.5               | 17.9         | 17.8    | 17.9     | 17.9      | 18.5  | 17.5    | 17.1     |
| IPSLALR                   | 17.8               | 18.1         | 18.0    | 18.1     | 18.1      | 18.6  | 17.7    | 17.3     | 18.7               | 19.0         | 18.9    | 19.1     | 19.1      | 19.5  | 18.6    | 18.2     |
| IPSLAMR                   | 17.6               | 17.9         | 17.7    | 17.9     | 17.9      | 18.4  | 17.4    | 17.1     | 18.9               | 19.1         | 18.9    | 19.2     | 19.2      | 19.6  | 18.6    | 18.2     |
| MICROESM                  | 18.4               | 18.5         | 18.2    | 18.6     | 18.8      | 18.9  | 18.0    | 17.7     | 20.0               | 20.2         | 19.7    | 20.3     | 20.4      | 20.6  | 19.5    | 19.2     |
| MICROESMCHEM              | 18.5               | 18.7         | 18.4    | 18.8     | 19.0      | 19.1  | 18.2    | 17.9     | 20.0               | 20.1         | 19.7    | 20.3     | 20.4      | 20.6  | 19.4    | 19.1     |
| NORES M1                  | 17.9               | 18.2         | 18.0    | 18.2     | 18.2      | 18.7  | 17.7    | 17.4     | 19.0               | 19.2         | 19.0    | 19.3     | 19.3      | 19.7  | 18.8    | 18.4     |
| BCCCSM                    | 17.6               | 17.9         | 17.8    | 17.9     | 17.9      | 18.4  | 17.5    | 17.1     | 18.7               | 18.9         | 18.8    | 18.9     | 18.9      | 19.4  | 18.5    | 18.1     |
|                           | Standard Deviation |              |         |          |           |       |         |          | Standard Deviation |              |         |          |           |       |         |          |
| Observed                  | 11.6               | 11.8         | 11.6    | 11.9     | 11.8      | 11.5  | 11.5    | 11.2     | 11.6               | 11.8         | 11.6    | 11.9     | 11.8      | 11.5  | 11.5    | 11.2     |
| CCSM4                     | 11.9               | 12.0         | 11.8    | 12.0     | 12.0      | 11.8  | 11.5    | 11.1     | 12.0               | 12.1         | 11.9    | 12.1     | 12.1      | 11.9  | 11.6    | 11.2     |
| ESM2G                     | 11.5               | 11.6         | 11.4    | 11.7     | 11.6      | 11.4  | 11.1    | 10.7     | 11.7               | 11.8         | 11.6    | 11.8     | 11.8      | 11.6  | 11.3    | 10.9     |
| ESM2M                     | 11.6               | 11.7         | 11.4    | 11.7     | 11.6      | 11.5  | 11.2    | 10.8     | 11.9               | 12.0         | 11.7    | 12.0     | 11.9      | 11.8  | 11.4    | 11.1     |
| IPSLALR                   | 11.6               | 11.7         | 11.5    | 11.8     | 11.7      | 11.5  | 11.2    | 10.8     | 12.1               | 12.1         | 11.9    | 12.2     | 12.1      | 11.9  | 11.6    | 11.3     |
| IPSLAMR                   | 11.7               | 11.8         | 11.6    | 11.8     | 11.7      | 11.6  | 11.3    | 10.9     | 12.0               | 12.1         | 11.9    | 12.1     | 12.0      | 11.9  | 11.6    | 11.2     |
| MICROESM                  | 11.0               | 11.0         | 10.9    | 11.1     | 11.1      | 10.8  | 10.7    | 10.3     | 11.3               | 11.5         | 11.3    | 11.6     | 11.7      | 11.4  | 10.9    | 10.5     |
| MICROESMCHEM              | 10.8               | 10.9         | 10.8    | 11.0     | 11.1      | 10.7  | 10.6    | 10.2     | 11.2               | 11.4         | 11.2    | 11.5     | 11.6      | 11.3  | 10.8    | 10.4     |
| NORES M1                  | 11.9               | 12.1         | 11.8    | 12.1     | 12.1      | 11.9  | 11.5    | 11.1     | 11.8               | 11.9         | 11.7    | 12.0     | 11.9      | 11.7  | 11.3    | 10.9     |
| BCCCSM                    | 11.6               | 11.7         | 11.6    | 11.8     | 11.7      | 11.6  | 11.3    | 10.9     | 12.0               | 12.2         | 12.0    | 12.2     | 12.2      | 12.0  | 11.7    | 11.3     |
|                           | Maximum            |              |         |          |           |       |         |          | Maximum            |              |         |          |           |       |         |          |
| Observed                  | 40.0               | 40.0         | 38.9    | 41.7     | 41.1      | 39.4  | 39.4    | 39.4     | 40.0               | 40.0         | 38.9    | 41.7     | 41.1      | 39.4  | 39.4    | 39.4     |
| CCSM4                     | 46.5               | 45.9         | 46.3    | 46.8     | 48.6      | 46.7  | 43.9    | 42.7     | 49.3               | 48.5         | 48.2    | 49.9     | 50.9      | 49.1  | 46.0    | 46.4     |

|                           |                    |              |         |          |           |      |         |          |                    |              |         |          |           |      |         |          |
|---------------------------|--------------------|--------------|---------|----------|-----------|------|---------|----------|--------------------|--------------|---------|----------|-----------|------|---------|----------|
| ESM2G                     | 48.7               | 48.9         | 49.1    | 48.3     | 50.2      | 48.9 | 47.9    | 46.7     | 52.3               | 50.3         | 50.9    | 51.0     | 52.9      | 50.7 | 48.3    | 48.3     |
| ESM2M                     | 48.4               | 47.9         | 47.9    | 48.1     | 48.5      | 47.5 | 45.9    | 45.3     | 51.5               | 49.7         | 51.2    | 50.2     | 51.6      | 50.6 | 48.9    | 46.9     |
| IPSLALR                   | 42.8               | 44.8         | 45.3    | 43.7     | 46.6      | 48.1 | 44.1    | 43.8     | 52.6               | 52.8         | 54.3    | 52.8     | 54.7      | 53.2 | 52.2    | 51.6     |
| IPSLAMR                   | 45.6               | 43.8         | 42.8    | 44.8     | 46.5      | 43.7 | 41.7    | 41.2     | 51.7               | 49.9         | 48.5    | 50.3     | 50.3      | 48.7 | 47.9    | 47.2     |
| MICROESM                  | 43.4               | 42.4         | 41.4    | 43.0     | 46.6      | 42.0 | 41.0    | 40.2     | 49.1               | 47.2         | 46.2    | 48.1     | 52.9      | 47.8 | 44.8    | 44.4     |
| MICROESMCHEM              | 42.7               | 42.8         | 43.2    | 43.1     | 45.9      | 43.2 | 41.0    | 40.4     | 46.2               | 47.0         | 46.1    | 47.3     | 52.2      | 50.4 | 44.8    | 42.8     |
| NORES M1                  | 51.2               | 49.8         | 48.6    | 51.2     | 53.9      | 51.4 | 46.5    | 45.7     | 52.6               | 51.8         | 53.5    | 53.9     | 56.5      | 54.0 | 49.3    | 48.0     |
| BCCCSM                    | 42.9               | 43.5         | 44.7    | 44.4     | 45.2      | 45.1 | 42.8    | 41.7     | 47.1               | 47.5         | 47.6    | 48.1     | 50.0      | 47.7 | 45.3    | 44.8     |
|                           |                    |              |         |          |           |      |         |          |                    |              |         |          |           |      |         |          |
| Maximum Temperature, , °C |                    |              |         |          |           |      |         |          |                    |              |         |          |           |      |         |          |
|                           | RCP 4.5            |              |         |          |           |      |         |          | RCP 8.5            |              |         |          |           |      |         |          |
|                           | Adrian             | BowlingGreen | Bucyrus | Defiance | FortWayne | Lima | Norwalk | Sandusky | Adrian             | BowlingGreen | Bucyrus | Defiance | FortWayne | Lima | Norwalk | Sandusky |
|                           | Mean               |              |         |          |           |      |         |          | Mean               |              |         |          |           |      |         |          |
| Observed                  | 3.3                | 4.5          | 4.0     | 4.1      | 4.8       | 5.5  | 4.5     | 5.9      | 3.3                | 4.5          | 4.0     | 4.1      | 4.8       | 5.5  | 4.5     | 5.9      |
| CCSM4                     | 5.2                | 6.1          | 6.1     | 6.0      | 6.6       | 7.1  | 6.3     | 7.9      | 6.3                | 7.1          | 7.0     | 7.0      | 7.5       | 8.0  | 7.2     | 8.9      |
| ESM2G                     | 5.1                | 6.1          | 6.0     | 6.0      | 6.6       | 7.1  | 6.2     | 7.8      | 6.1                | 7.1          | 7.0     | 6.9      | 7.5       | 8.0  | 7.2     | 8.8      |
| ESM2M                     | 4.9                | 5.8          | 5.7     | 5.7      | 6.3       | 6.8  | 5.9     | 7.6      | 7.5                | 6.7          | 6.6     | 6.5      | 7.1       | 7.6  | 6.8     | 8.4      |
| IPSLALR                   | 6.0                | 6.9          | 6.8     | 6.8      | 7.4       | 7.9  | 7.0     | 8.7      | 7.0                | 8.0          | 7.8     | 7.8      | 8.5       | 8.9  | 8.0     | 9.7      |
| IPSLAMR                   | 6.0                | 6.9          | 6.8     | 6.8      | 7.4       | 7.9  | 7.0     | 8.6      | 7.2                | 8.1          | 7.9     | 8.0      | 8.6       | 9.0  | 8.1     | 9.8      |
| MICROESM                  | 6.9                | 7.8          | 7.5     | 7.7      | 8.3       | 8.7  | 7.7     | 9.4      | 8.0                | 8.8          | 8.6     | 8.7      | 9.3       | 9.6  | 8.9     | 10.6     |
| MICROESMCHEM              | 6.9                | 7.8          | 7.6     | 7.7      | 8.4       | 8.8  | 7.8     | 9.5      | 8.1                | 8.9          | 8.7     | 8.8      | 9.4       | 9.8  | 9.0     | 10.7     |
| NORES M1                  | 5.6                | 6.5          | 6.4     | 6.4      | 7.0       | 7.5  | 6.6     | 8.3      | 6.7                | 7.5          | 7.4     | 7.4      | 8.0       | 8.5  | 7.6     | 9.3      |
| BCCCSM                    | 5.8                | 6.7          | 6.5     | 6.6      | 7.2       | 7.6  | 6.8     | 8.4      | 7.0                | 7.8          | 7.7     | 7.7      | 8.3       | 8.8  | 7.9     | 9.6      |
|                           | Standard Deviation |              |         |          |           |      |         |          | Standard Deviation |              |         |          |           |      |         |          |
| Observed                  | 10.0               | 10.1         | 10.1    | 10.4     | 10.3      | 10.3 | 10.1    | 10.2     | 10.0               | 10.1         | 10.1    | 10.4     | 10.3      | 10.3 | 10.1    | 10.2     |
| CCSM4                     | 9.5                | 9.6          | 9.6     | 9.8      | 9.9       | 9.8  | 9.5     | 9.6      | 9.6                | 9.8          | 9.8     | 10.0     | 10.1      | 10.0 | 9.6     | 9.8      |
| ESM2G                     | 9.5                | 9.6          | 9.6     | 9.8      | 9.9       | 9.8  | 9.4     | 9.6      | 9.7                | 9.8          | 9.8     | 10.0     | 10.1      | 10.0 | 9.7     | 9.8      |
| ESM2M                     | 9.7                | 9.8          | 9.8     | 10.0     | 10.0      | 10.0 | 9.7     | 9.8      | 10.3               | 10.0         | 10.0    | 10.2     | 10.3      | 10.2 | 9.9     | 10.0     |
| IPSLALR                   | 9.7                | 9.7          | 9.7     | 9.9      | 10.0      | 9.9  | 9.6     | 9.8      | 10.2               | 10.2         | 10.2    | 10.4     | 10.5      | 10.3 | 10.1    | 10.2     |
| IPSLAMR                   | 9.8                | 9.9          | 9.9     | 10.1     | 10.1      | 10.0 | 9.8     | 9.9      | 10.1               | 10.2         | 10.2    | 10.4     | 10.5      | 10.4 | 10.1    | 10.2     |
| MICROESM                  | 9.0                | 9.2          | 9.2     | 9.4      | 9.7       | 9.5  | 9.0     | 9.1      | 9.2                | 9.5          | 9.5     | 9.7      | 9.9       | 9.8  | 9.2     | 9.4      |
| MICROESMCHEM              | 9.0                | 9.2          | 9.2     | 9.4      | 9.7       | 9.5  | 9.0     | 9.1      | 9.2                | 9.4          | 9.4     | 9.7      | 9.9       | 9.7  | 9.2     | 9.3      |
| NORES M1                  | 9.5                | 9.7          | 9.7     | 9.9      | 10.0      | 9.9  | 9.5     | 9.7      | 9.5                | 9.7          | 9.7     | 9.9      | 10.0      | 9.9  | 9.5     | 9.6      |
| BCCCSM                    | 9.1                | 9.3          | 9.3     | 9.5      | 9.5       | 9.5  | 9.1     | 9.3      | 9.4                | 9.6          | 9.7     | 9.8      | 9.9       | 9.9  | 9.5     | 9.6      |
|                           | Maximum            |              |         |          |           |      |         |          | Maximum            |              |         |          |           |      |         |          |



|              |      |      |      |      |      |      |      |      |      |      |      |      |      |      |      |      |
|--------------|------|------|------|------|------|------|------|------|------|------|------|------|------|------|------|------|
| Observed     | 24.4 | 25.6 | 24.4 | 28.3 | 25.6 | 31.7 | 26.1 | 31.7 | 24.4 | 25.6 | 24.4 | 28.3 | 25.6 | 31.7 | 26.1 | 31.7 |
| CCSM4        | 26.3 | 27.5 | 26.9 | 27.6 | 28.1 | 27.9 | 27.3 | 27.4 | 30.1 | 29.9 | 30.0 | 30.6 | 31.0 | 32.4 | 29.7 | 30.6 |
| ESM2G        | 27.4 | 28.1 | 26.8 | 28.4 | 30.6 | 28.8 | 26.6 | 26.8 | 30.1 | 30.6 | 30.4 | 30.4 | 31.9 | 31.5 | 29.7 | 30.3 |
| ESM2M        | 26.5 | 27.5 | 28.3 | 27.0 | 29.1 | 29.1 | 27.6 | 27.3 | 32.2 | 31.3 | 31.8 | 30.8 | 31.2 | 31.5 | 30.8 | 30.9 |
| IPSLALR      | 28.0 | 28.5 | 28.3 | 28.9 | 30.4 | 29.4 | 28.0 | 28.6 | 33.1 | 33.5 | 33.1 | 34.0 | 34.7 | 34.9 | 33.4 | 33.6 |
| IPSLAMR      | 28.8 | 30.1 | 29.2 | 29.2 | 29.7 | 30.2 | 28.8 | 29.3 | 33.1 | 34.1 | 33.8 | 33.9 | 34.9 | 34.4 | 34.0 | 34.5 |
| MICROESM     | 28.1 | 29.0 | 28.4 | 28.5 | 29.6 | 28.8 | 27.5 | 28.2 | 30.6 | 30.8 | 30.4 | 31.2 | 32.3 | 31.7 | 30.2 | 30.9 |
| MICROESMCHEM | 27.2 | 27.5 | 27.3 | 27.8 | 29.4 | 28.1 | 27.6 | 28.8 | 30.1 | 30.3 | 30.8 | 31.0 | 32.2 | 31.8 | 29.8 | 31.1 |
| NORES M1     | 27.0 | 27.4 | 26.6 | 27.8 | 29.9 | 28.7 | 25.7 | 27.5 | 29.9 | 30.7 | 29.2 | 31.0 | 32.4 | 31.0 | 29.2 | 30.4 |
| BCCCSM       | 27.7 | 27.9 | 27.0 | 28.1 | 29.1 | 29.0 | 27.1 | 28.4 | 30.8 | 31.7 | 30.0 | 30.2 | 31.4 | 31.0 | 30.2 | 30.8 |

## FIGURES

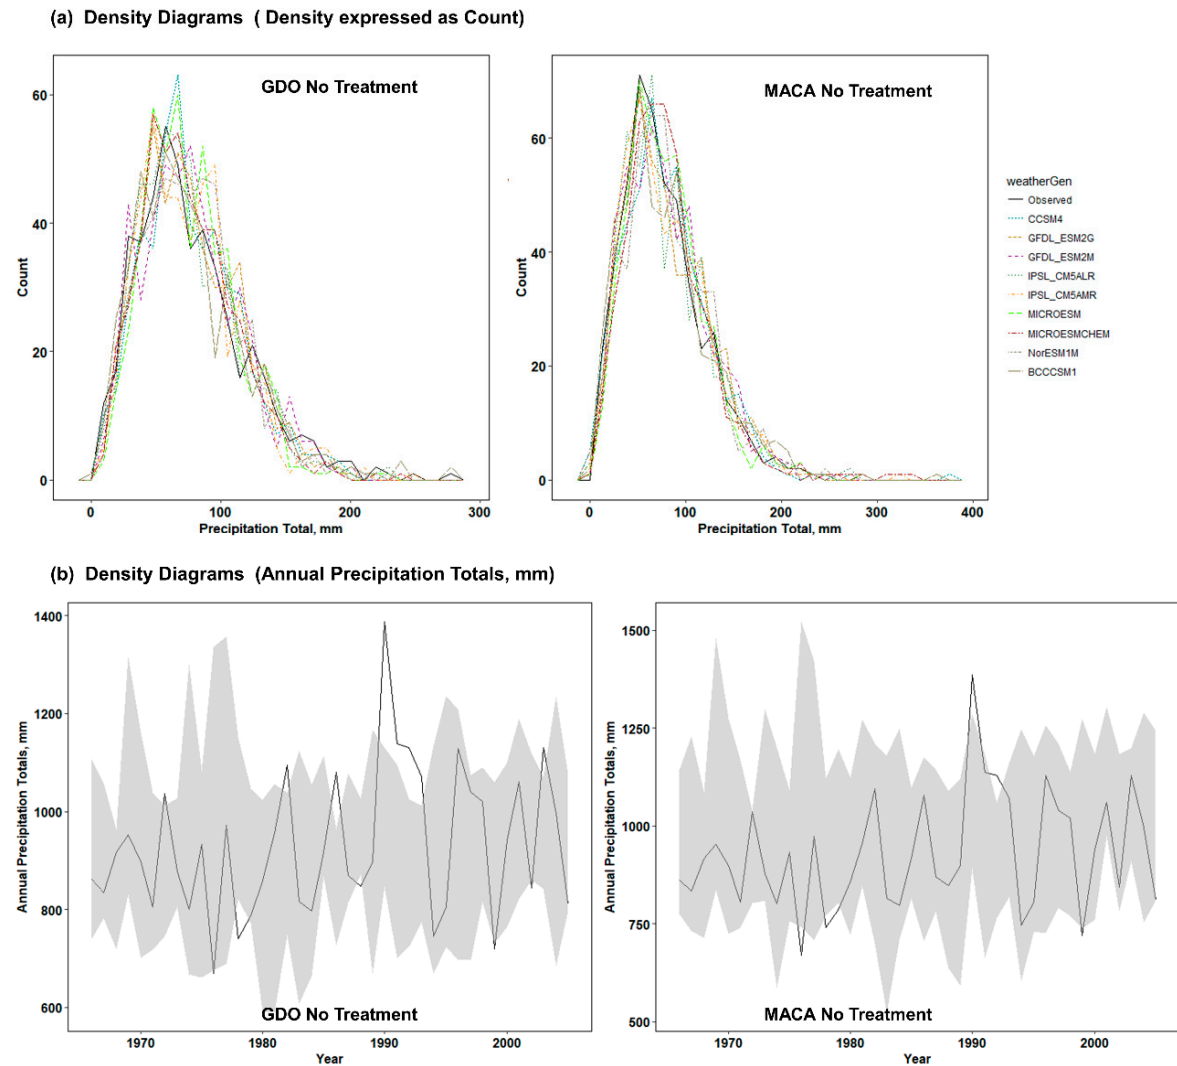

**Figure S1.** (A) (a) Density distribution charts for Fort Wayne, IN for count of monthly precipitation totals, mm, in each year (b) Distribution of annual precipitation totals, mm, with range bound from different climate model outputs. (For the period from 1966–2015 for GDO (right frame) and 1966–2005 for MACA (left frame)).

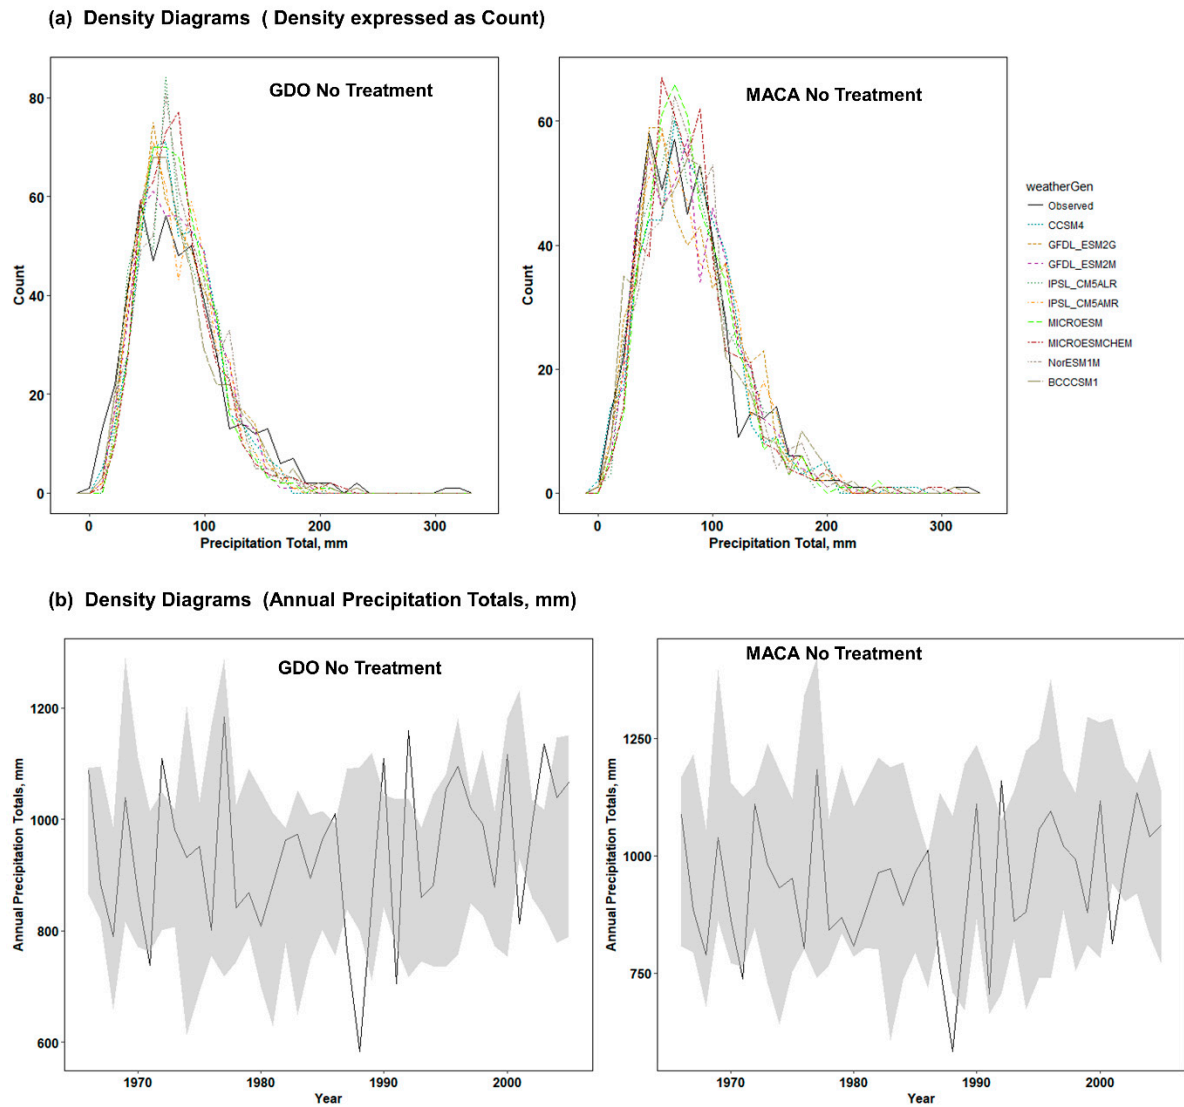

**Figure S1. (B)** (a) Density distribution charts for Norwalk, OH for count of monthly precipitation totals, mm, in each year (b) Distribution of annual precipitation totals, mm, with range bound from different climate model outputs. (For the period from 1966–2015 for GDO (right frame) and 1966–2005 for MACA (left frame)).

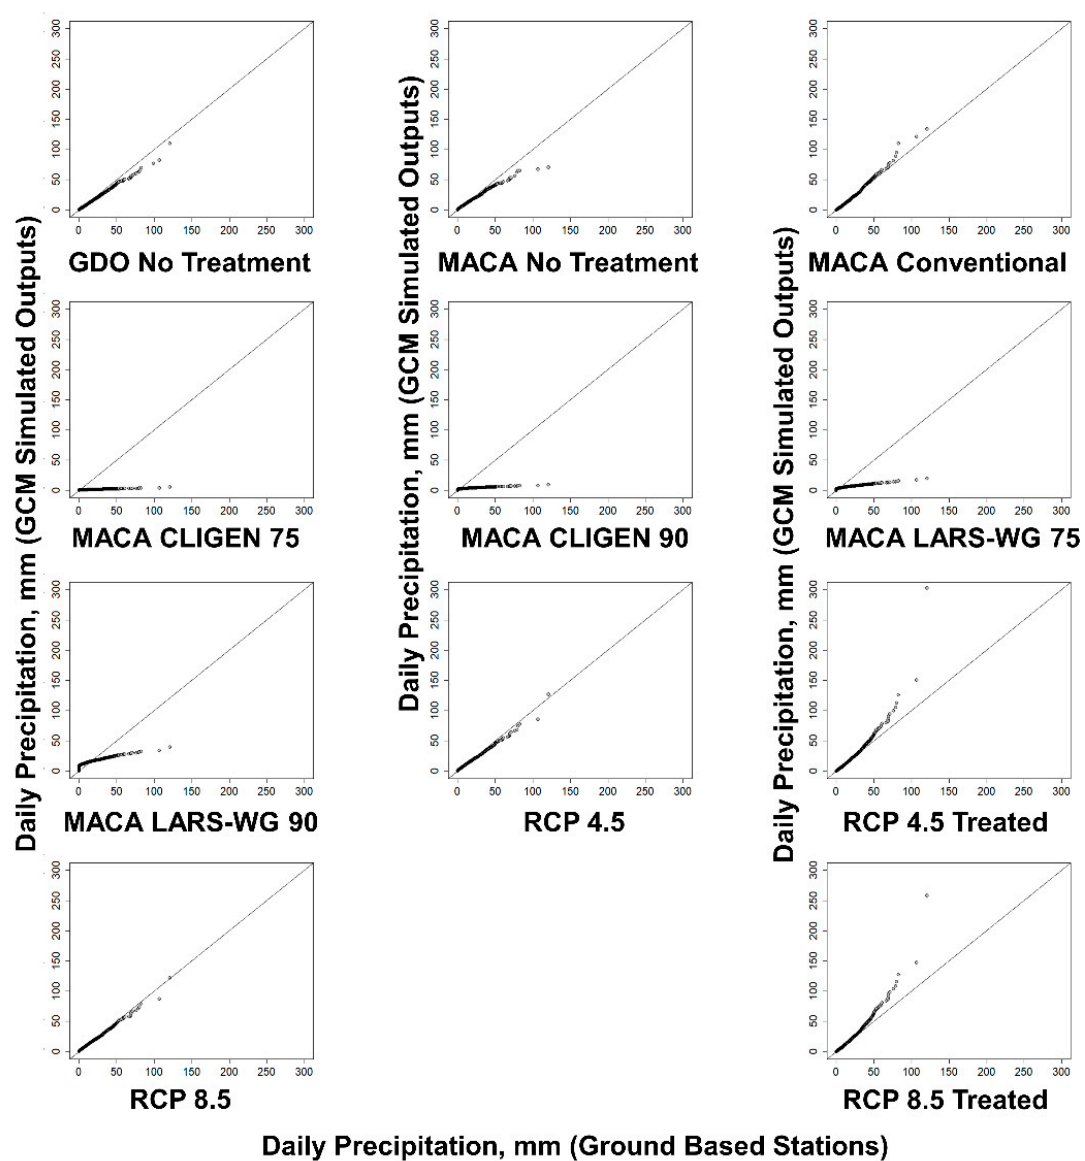

**Figure S2. (A)** Q–Q Plots to evaluate the performance of different bias correction methods for period between 1966 and 2005 to reduce the bias in simulating values for daily precipitation, mm and to present the future climatic scenarios (2006–2099) for Adrian, MI.

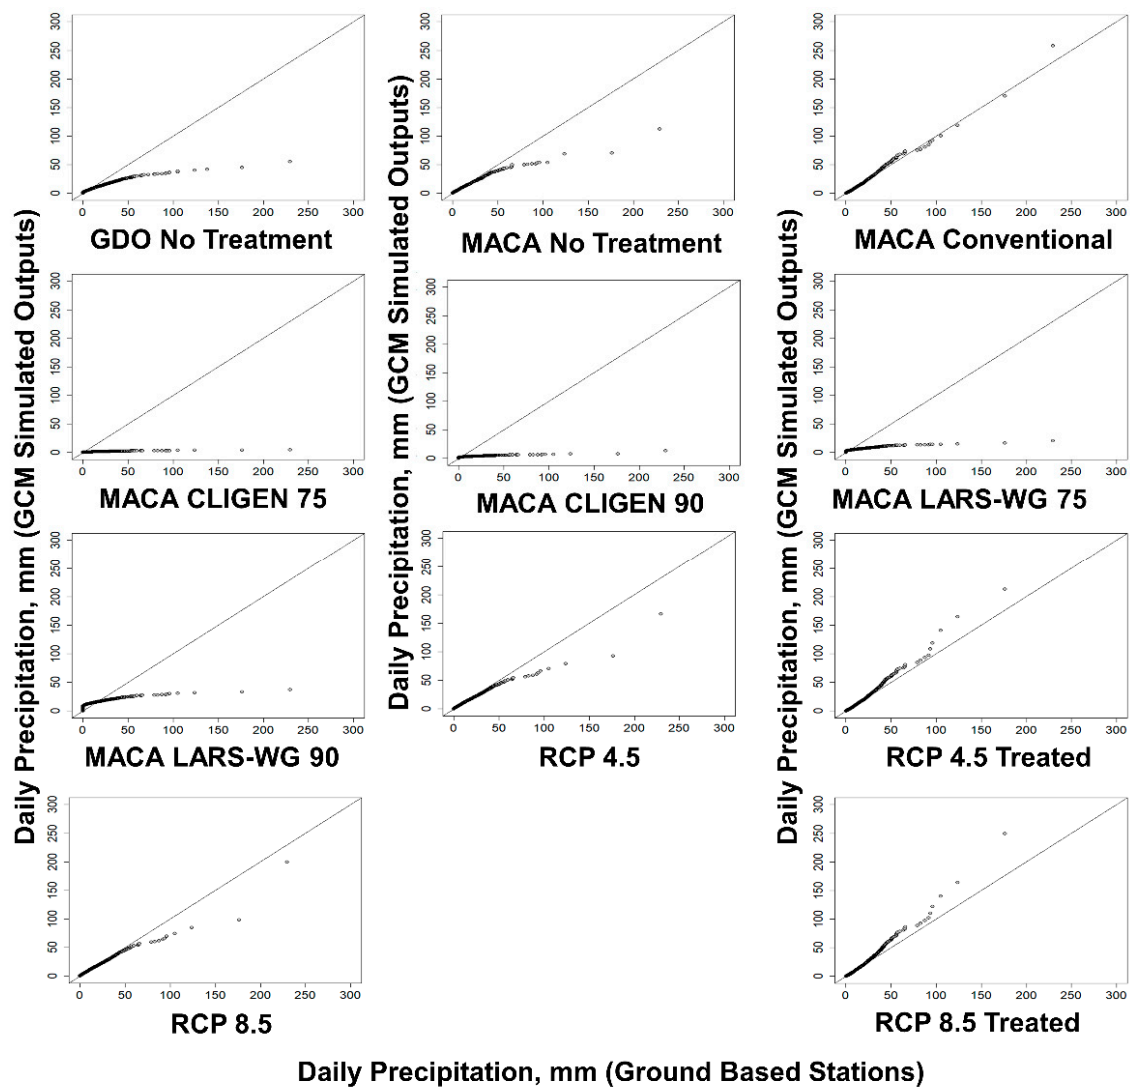

**Figure S2. (B)** Q–Q Plots to evaluate the performance of different bias correction methods for period between 1966 and 2005 to reduce the bias in simulating values for daily precipitation, mm and to present the future climatic scenarios (2006–2009) for Norwalk, OH.

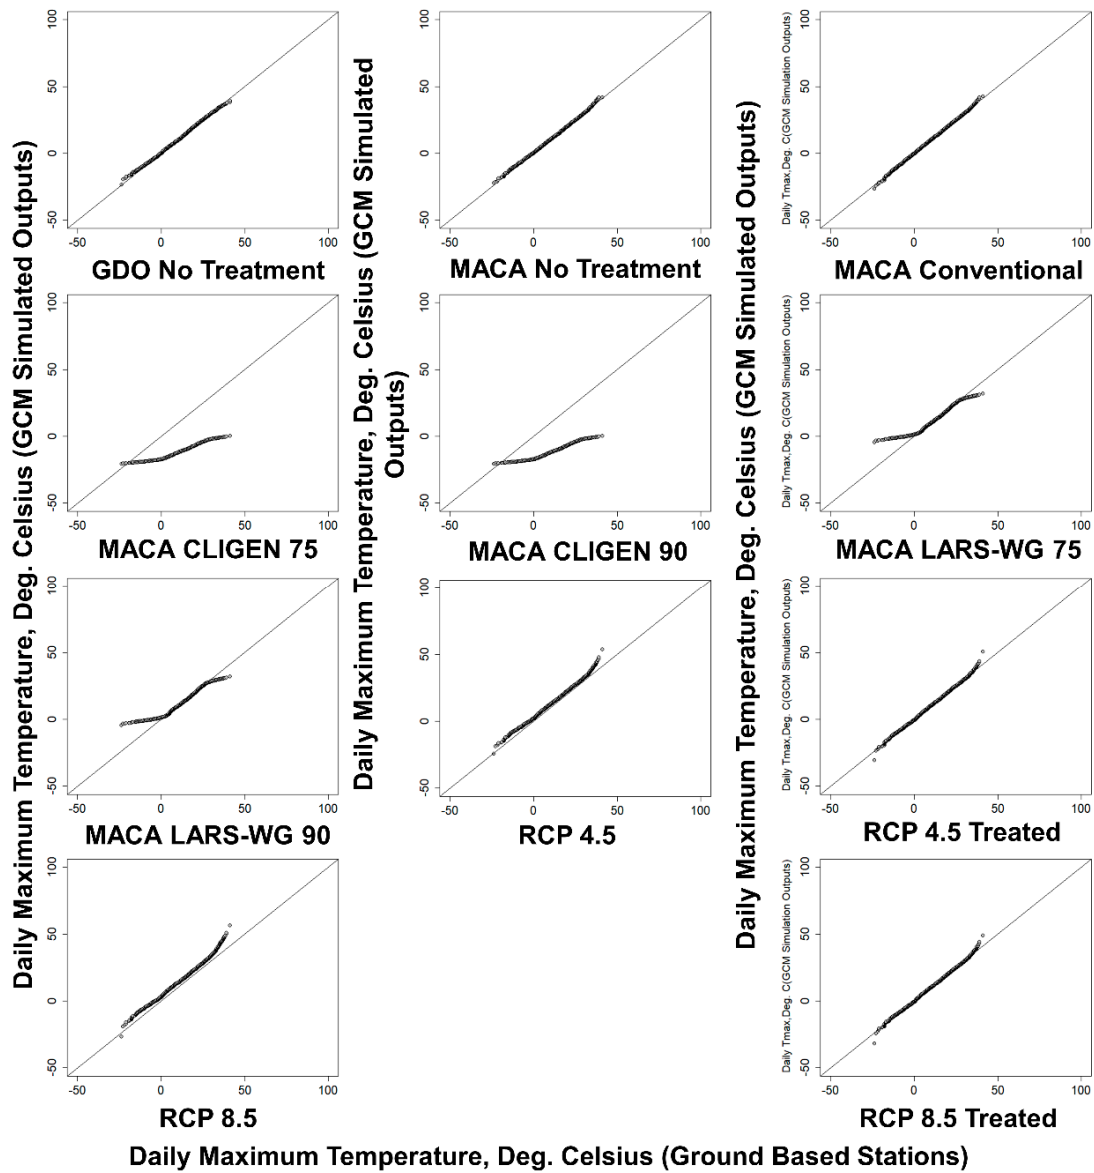

**Figure S2. (C)** Q–Q Plots to evaluate the performance of different bias correction methods for period between 1966 and 2005 to reduce the bias in simulating values for daily maximum temperature, °C and to present the future climatic scenarios (2006–2099) for Fort Wayne, IN.

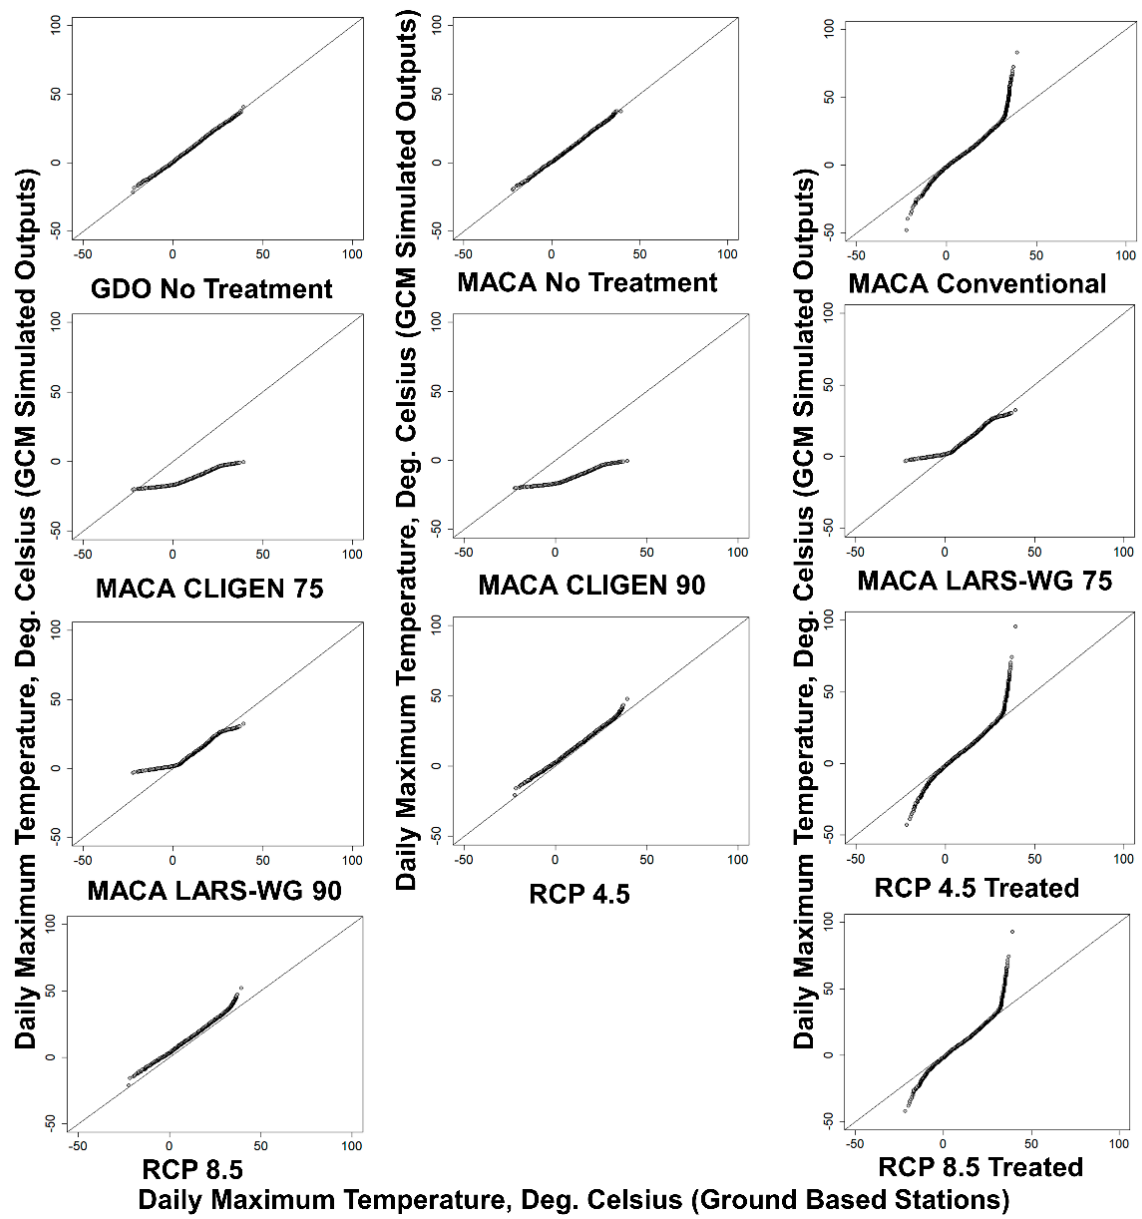

**Figure S2. (D)** Q-Q Plots to evaluate the performance of different bias correction methods for period between 1966 and 2005 to reduce the bias in simulating values for daily maximum temperature, °C and to present the future climatic scenarios (2006–2099) for Norwalk, OH.

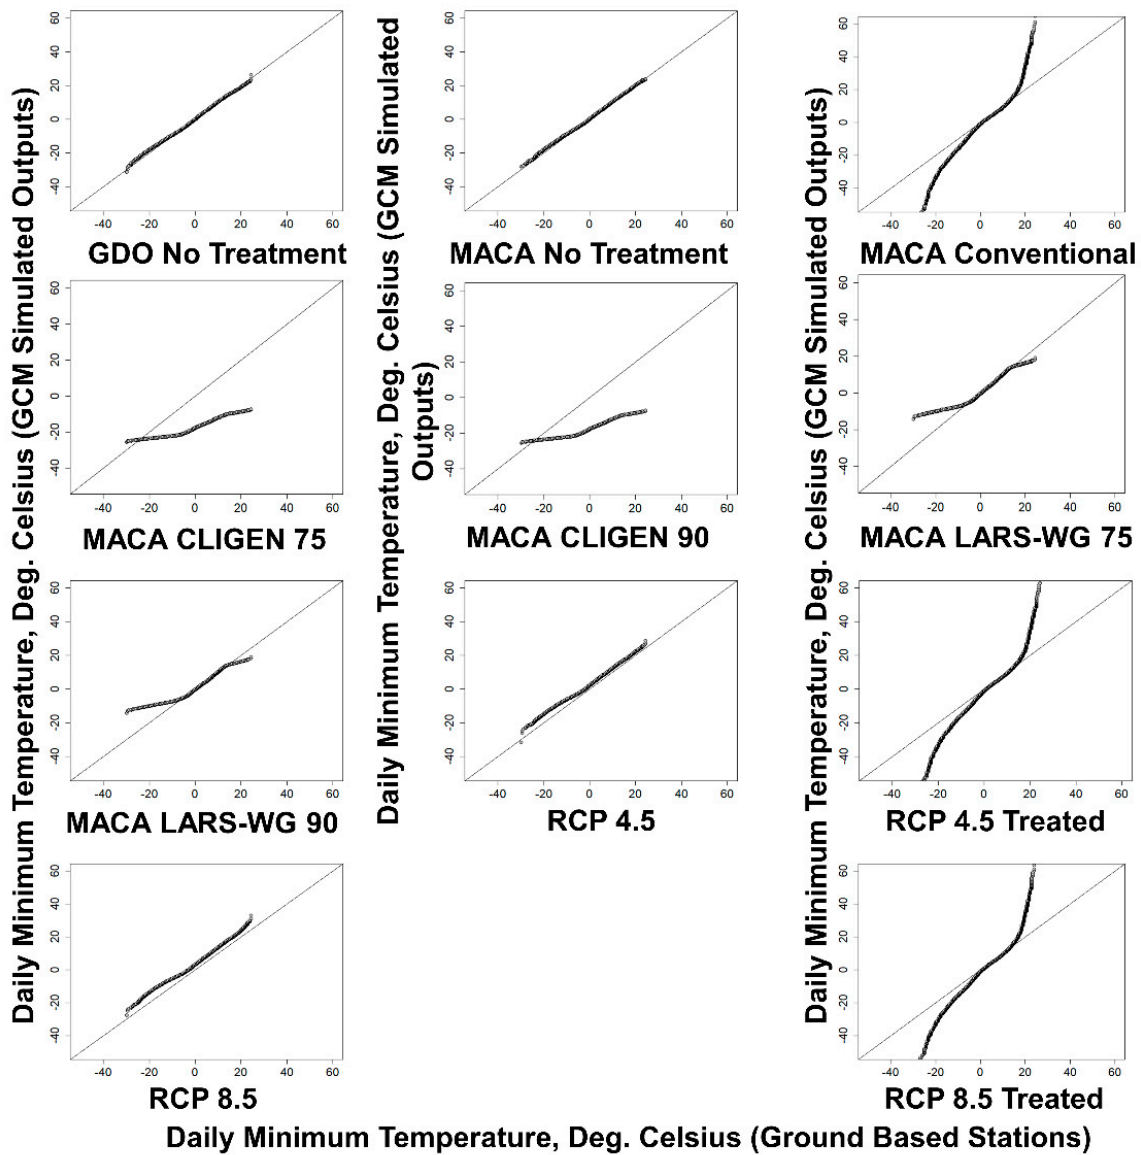

**Figure S2. (E)** Q–Q Plots to evaluate the performance of different bias correction methods for period between 1966 and 2005 to reduce the bias in simulating values for daily minimum temperature, °C and to present the future climatic scenarios (2006–2099) for Adrian, MI.



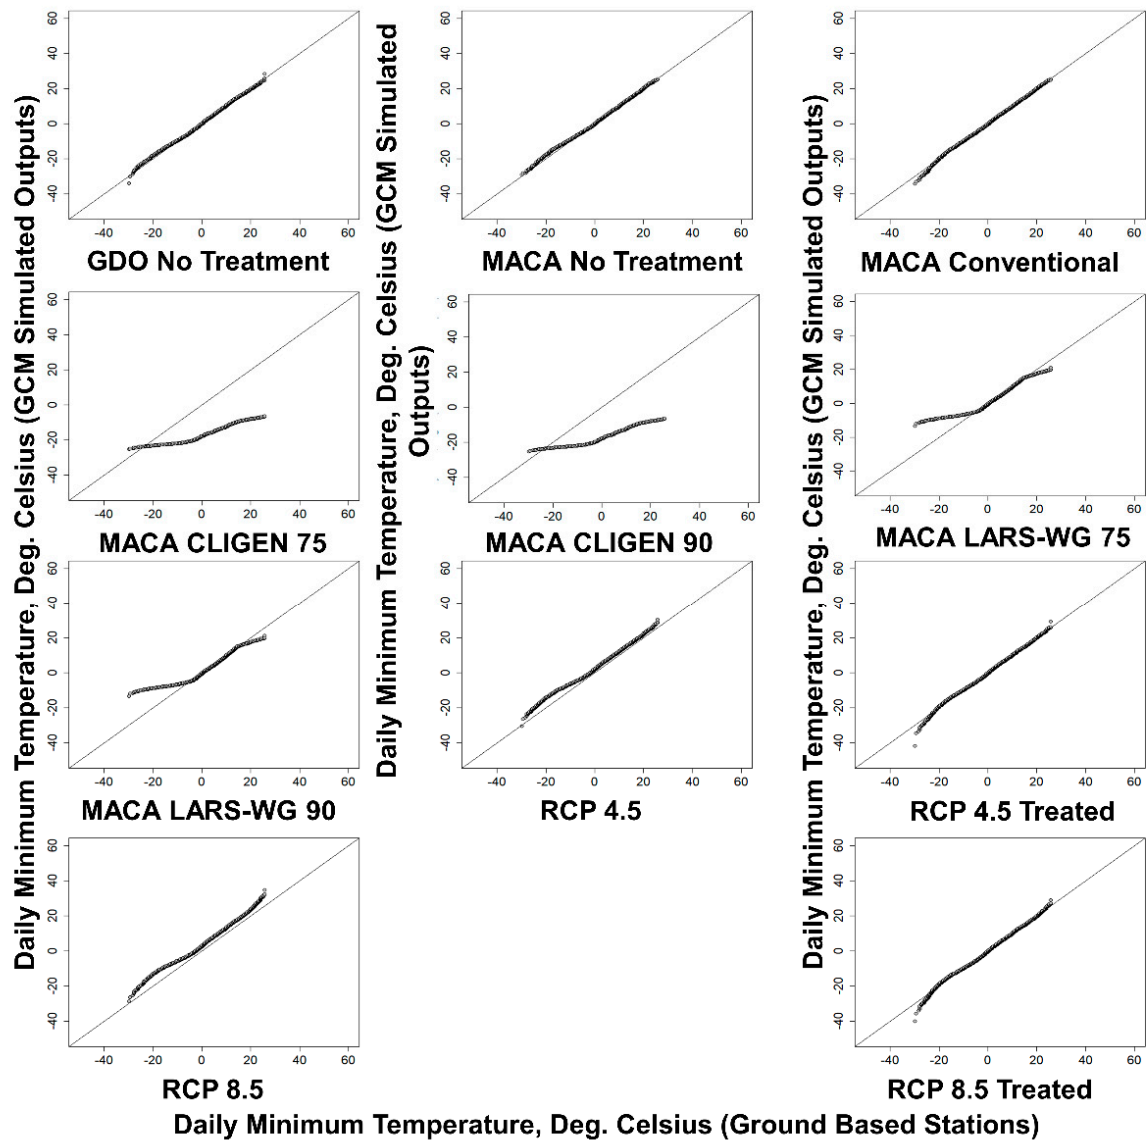

**Figure S2. (F)** Q–Q Plots to evaluate the performance of different bias correction methods for period between 1966 and 2005 to reduce the bias in simulating values for daily minimum temperature, °C and to present the future climatic scenarios (2006–2099) for Fort Wayne, IN.

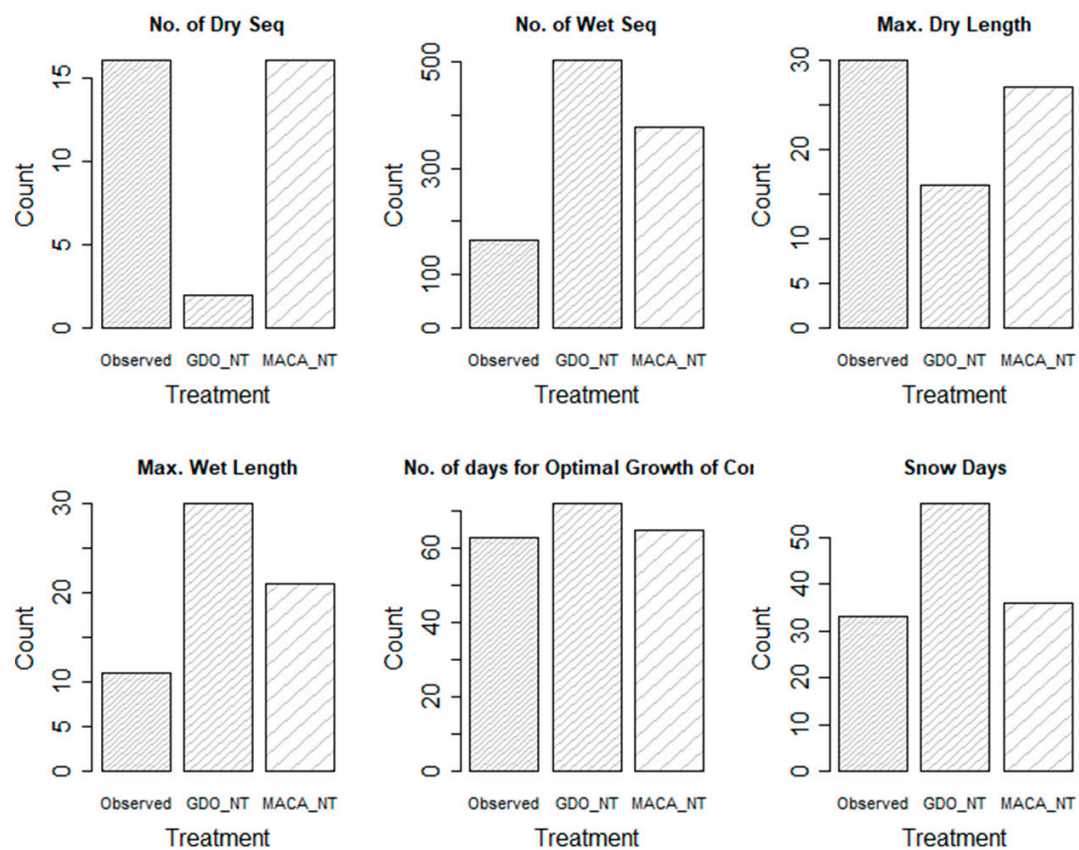

**Figure S3. (A)** Comparison of GDO and MACA climate projection sources for different climate indices for Fort Wayne IN between 1966 and 2005 (GDO\_NT: GDO No Treatment; MACA\_NT: MACA No Treatment).

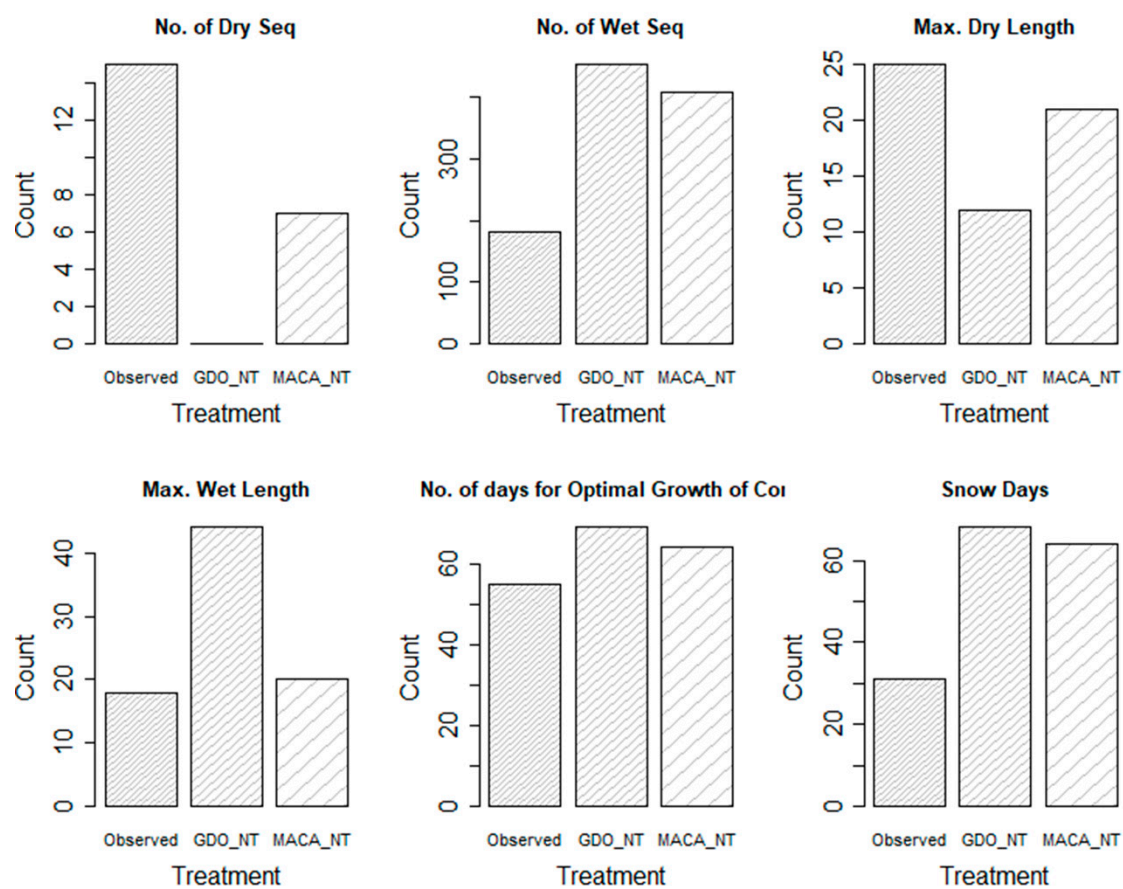

**Figure S3. (B)** Comparison of GDO and MACA climate projection sources for different climate indices for Norwalk, OH between 1966 and 2005 (GDO\_NT: GDO No Treatment; MACA\_NT: MACA No Treatment).
